# Supplementary material for: Forest Ecosystems and Evolution of Cattle Husbandry Practices of the Earliest Central European Farming Societies
Source: Research Square preprint supplement (doi:10.21203/rs.3.rs-1419935/v1), 2022-03-10
Supplement: Supplementary file 1 [file 27f2ba2383de893b2a453405.xlsx]

## Sheet: SI_Table 1_Dataset overview
					Dairy lipids		Cattle Bone collagen		Deer Bone Collagen		Dental bioapatite				Dentine		Culture and Chronology					Palaeoecology				Palaeoclimatic
Site number (map)	Site	Country	Latitude	Longitude	Nr of arch animal fats with Δ13C≤-3.1‰	Reference	No of δ13C measurements	Reference	No of δ13C measurements	Reference	No of δ18O measurements	Reference	No of δ13C measurements	Reference	No of δ15N CSIA-AA measurements	Reference	Culture	Date start (cal BC)	Date end (cal BC)	Mean date (cal BC)	Reference (dates)	MFC	RDS	SSO	DNR (m)	TMS	TMW	PMS	PMW
1	Cuiry-lès-Chaudardes	France	49.384	3.764	49	This study	8	Balasse 1999 unpub.	10	Balasse 1999 unpublished	NA	NA	NA	NA	NA	NA	LBK	5137	4773		1	63.9094	Seine	4	177.462	16.0195	1.66028	220.003	218.689
2	Maastricht-Cannerberg	Netherlands	50.825	5.668	2	This study	NA	NA	NA	NA	NA	NA	NA	NA	NA	NA	LBK	5100	5081		2	70.9126	Meuse	3	292.554	15.9833	0.193127	222.621	192.507
3	Maastricht-Klinkers	Netherlands	50.872	5.671	5	This study	NA	NA	NA	NA	NA	NA	NA	NA	NA	NA	LBK	5100	5081		2	70.3043	Meuse	6	888.24	15.9846	0.179915	222.659	192.276
4	Geleen-Janskamperveld	Netherlands	50.985	5.814	20	This study	NA	NA	NA	NA	NA	NA	NA	NA	NA	NA	LBK	5220	5170		3	71.7069	Meuse	2	2810.76	15.9791	0.04846	223.158	190.704
5	Erkelenz-Kückhoven	Germany	51.061	6.348	1	This study	NA	NA	NA	NA	NA	NA	NA	NA	NA	NA	LBK	5200	5100		4,7	73.9159	Meuse	1	2748.16	15.9606	-0.242336	224.288	187.641
6	Konigshoven 14 (FR 5)	Germany	51.004	6.537	11	This study	NA	NA	NA	NA	NA	NA	NA	NA	NA	NA	LBK			5100	5,7	72.9257	Middle Rhine	1	1369.7	15.9532	-0.306231	224.544	187.136
7	Langweiler 8	Germany	50.88	6.25	5	This study	NA	NA	NA	NA	NA	NA	NA	NA	NA	NA	LBK			5250	6,7	74.41	Meuse	1	804.3	16	-0.1	223.969	188.953
8	Ensisheim-Ratfeld	France	47.876	7.354	19	Casanova et al. 2020	NA	NA	NA	NA	NA	NA	NA	NA	NA	NA	LBK	5342	5070		8	70.9603	Upper Rhine	5	754.314	15.6598	-0.131099	225.668	187.826
9	Colmar	France	48.076	7.373	2	Casanova et al. 2020	NA	NA	NA	NA	NA	NA	NA	NA	NA	NA	LBK	5298	5183		8	70.5431	Upper Rhine	6	991.685	15.655	-0.0409621	225.84	188.938
10	Sierentz	France	47.66	7.45	20	Casanova et al. 2020	NA	NA	NA	NA	NA	NA	NA	NA	NA	NA	LBK	5183	5070		8	73.9561	Upper Rhine	1	816.753	15.6873	-0.478011	226.232	189.57
11	Bischoffsheim	France	48.483	7.483	5	Casanova et al. 2020	18	Gillis et al. submitted; Bickle et al. 2013a	6	Gillis et al. submitted	133	Balasse et al. 2021	133	Gillis et al. submitted	18	Gillis et al. submitted	LBK	5298	5138		8	75.1837	Upper Rhine	1	1555.04	15.7016	-0.189671	227.874	189.57
12	Herxhiem	Germany	49.51	8.179	NA	NA	1	Durrwachter et al. 2005	1	Durrwachter et al. 2005	NA	NA	NA	NA	NA	NA	LBK	5292	5050		9	75.082	Upper Rhine	1	1002.27	15.728	-0.345127	228.959	188.266
13	Kilianstädten	Germany	50.205	8.843	1	This study	NA	NA	NA	NA	NA	NA	NA	NA	NA	NA	LBK	5207	4849		10	77.7022	Middle Rhine	4	861.248	15.8067	-0.532126	227.603	185.335
14	Vaihingen an der Enz	Germany	48.9	8.96	NA	NA	25	Fraser et al. 2013	9	Fraser et al. 2013	NA	NA	NA	NA	NA	NA	LBK					81.4364	Upper Rhine	1	516.562	15.513	0.0821098	234.482	194.272
15	Heilbron-Neckargartach	Germany	49.1686	9.19806	NA	NA	8	Bentley et al. 2013	NA	NA	NA	NA	NA	NA	NA	NA	LBK					76.5404	Upper Rhine	1	481.221	15.6281	-0.251634	230.887	189.096
16	Dillingen-Steinheim	Germany	48.019	10.155	1	This study	NA	NA	NA	NA	NA	NA	NA	NA	NA	NA	LBK	5250	5100		11	85.6011	Upper Danube	6	865.686	15.4754	-0.0828355	229.947	191.403
17	Derenburg Meerenstieg II	Germany	51.86	10.9	NA	NA	5	Oelze et al. 2012	NA	NA	NA	NA	NA	NA	NA	NA	LBK	5200	4800		12	84.285	Upper Elbe	2	444.689	15.7197	0.145977	236.461	223.107
18	Halberstadt Sonntagsfeld	Germany	51.895	11.04	NA	NA	3	Oelze et al. 2012	NA	NA	NA	NA	NA	NA	NA	NA	LBK	5200	4800		12	82.476	Upper Elbe	2	350.6	15.7993	-0.244342	233.617	209.003
19	Karsdorf	Germany	51.3	11.65	NA	NA	15	Oelze et al. 2012	1	Oelze et al. 2012	NA	NA	NA	NA	NA	NA	LBK	5200	5070		13	84.4232	Upper Elbe	5	1729.78	15.8638	-1.40935	228.298	178.867
20	Altscherbitz	Germany	51.392	12.233	2	This study	NA	NA	NA	NA	NA	NA	NA	NA	NA	NA	LBK	5500	5000		14	80.9114	Upper Elbe	5	231.75	15.9	-2.03727	227.228	169.538
21	Brodau	Germany	51.491	12.336	3	Salque 2012	NA	NA	NA	NA	NA	NA	NA	NA	NA	NA	LBK	5200	5000		15	81.1621	Upper Elbe	3	105.489	15.9163	-2.1925	227.028	167.63
22	Aiterhofen	Germany	48.8	12.6	NA	NA	6	Hoffman et al. 2013	1	Hoffman et al. 2013	NA	NA	NA	NA	NA	NA	LBK					83.7648	Upper Danube	2	1688.21	15.6984	-2.50076	227.313	163.781
23	Lerchenhaid	Germany	48.8824	12.5278	NA	NA	17	Hoffman et al. 2013	NA	NA	NA	NA	NA	NA	NA	NA	LBK					82.9224	Upper Danube	2	1688.2	15.7014	-2.41166	227.32	164.54
24	Stephansposching	Germany	48.815	12.804	1	This study	NA	NA	NA	NA	NA	NA	NA	NA	NA	NA	LBK	5060	4950		11	82.477	Upper Danube	2	2174.59	15.6974	-2.74798	227.272	161.557
25	Rutzig/Haid	Austria	48.2	14.2	NA	NA	11	Bickle et al. 2013a	1	Bickle et al. 2013a	NA	NA	NA	NA	NA	NA	LBK					78.9224	Upper Danube	6	986.037	15.6161	-4.39602	227.296	147.364
26	Płonia 2	Poland	53.356	14.737	3	This study	NA	NA	NA	NA	NA	NA	NA	NA	NA	NA	LBK	5300	4800		16	81.6863	Oder	1	65.358	16.3685	-4.62839	221.811	129.977
27	Brzezin 7	Poland	53.183	14.9	3	This study	NA	NA	NA	NA	NA	NA	NA	NA	NA	NA	LBK	5300	5000		16	81.043	Oder	3	2893.89	16.3042	-4.5693	222.385	131.791
28	Karwowo 1	Poland	53.683	15.533	9	This study	NA	NA	NA	NA	NA	NA	NA	NA	NA	NA	LBK	5100	4800		16	84.4435	Oder	2	1338.3	16.3909	-4.77036	221.459	127.198
29	Żalęcino	Poland	53.198	15.083	1	This study	NA	NA	NA	NA	NA	NA	NA	NA	NA	NA	LBK					81.4308	Oder	1	3557.18	16.3048	-4.59433	222.392	131.231
30	Żuków	Poland	53.155	15.113	1	This study	NA	NA	NA	NA	NA	NA	NA	NA	NA	NA	LBK					81.8945	Oder	2	1808.07	16.2941	-4.58489	222.501	131.477
31	Černý Vůl	Czechia	50.2	14.3	NA	NA	5	Berthon et al. 2017	NA	NA	88	Berthon et al. 2017	88	Berthon et al. 2017	NA	NA	LBK	5200	5000		17	84.2002	Elbe headwater	1	904.429	15.7758	-4.2066	227.89	147.171
32	Bylany	Czechia	49.936	15.242	6	Matlova et al. 2017; Brychova, V. et al. 2021	NA	NA	NA	NA	NA	NA	NA	NA	NA	NA	LBK	5500	5100		3,4	85.3633	Elbe headwater	1	323.944	15.6435	-5.46772	233.07	138.547
33	Chotěbudice	Czechia	50.3	15.574	NA	NA	15	Berthon et al. 2017	NA	NA	190	Berthon et al. 2017/Kovačiková et al. 2012	190	Berthon et al. 2017/Kovačiková et al. 2012	NA	NA	LBK	5400	5100		18,19	84.1726	Elbe headwater	1	829.252	15.7376	-5.20438	231.2	138.773
34	Stroegen	Austria	48.671	15.607	2	This study	NA	NA	NA	NA	NA	NA	NA	NA	NA	NA	LBK	5475	5275		20	84.9721	Upper Danube	2	197.105	15.0695	-7.56982	228.654	117.763
35	Těšetice-Kyjovice	Czechia	48.886	16.157	1	This study	7	Whittle et al. 2013a	NA	NA	23	Balasse et al. 2021	23	This study	NA	NA	LBK	5300	5000		21	80.0521	Upper Danube	1	384.97	13.4672	-11.4423	233.859	78.5904
36	Brunn am Gebirge	Austria	48.117	16.297	2	This study	NA	NA	NA	NA	NA	NA	NA	NA	NA	NA	LBK	5410	5350		22	75.88	Upper Danube	1	1121.87	15.1769	-6.62024	229.113	128.115
37	Gnadendorf	Austria	48.6	16.3987	NA	NA	6	Bickle et al. 2013b	NA	NA	NA	NA	NA	NA	NA	NA	LBK					79.2333	Upper Danube	2	912.937	13.4499	-11.5522	233.392	78.5952
38	Vedrovice-Sídliště	Czechia	49	16.3785	NA	NA	3	Whittle et al. 2013b	NA	NA	NA	NA	NA	NA	NA	NA	LBK	5340	5090		23	78.6804	Upper Danube	1	1293.59	13.7531	-11.064	233.697	85.2502
39	Asparn a.d. Zaya/Schletz	Austria	48.58	16.5	NA	NA	1	Bickle et al. 2013b	NA	NA	NA	NA	NA	NA	NA	NA	LBK	5210	4950		24	77.5431	Upper Danube	2	52.5175	13.774	-11.0943	232.601	86.2075
40	Blatné	Slovakia	48.3	17.4171	NA	NA	11	Bickle et al. 2013b	NA	NA	NA	NA	NA	NA	NA	NA	LBK					74.1485	Mid Danube	2	2069.53	15.3631	-6.05054	228.082	130.947
41	Chabsko 24	Poland	52.633	17.933	2	This study	NA	NA	NA	NA	NA	NA	NA	NA	NA	NA	LBK	5100	4800		16	83.1642	Oder	1	1073.44	16.3605	-5.0215	224.11	120.658
42	Żegotki	Poland	52.667	18.209	7	This study	NA	NA	NA	NA	NA	NA	NA	NA	NA	NA	LBK	5200	4800		16	82.9291	Oder	1	264.145	16.3664	-5.00773	223.519	120.898
43	Bożejewice 22/23	Poland	52.689	18.243	5	This study	NA	NA	NA	NA	NA	NA	NA	NA	NA	NA	LBK	5300	5200		16	82.9291	Oder	3	789.448	16.3737	-5.02378	223.413	120.671
44	Rożniaty 2	Poland	52.706	18.295	2	This study	NA	NA	NA	NA	NA	NA	NA	NA	NA	NA	LBK	5300	5200		16	82.634	Oder	4	911.318	16.378	-5.0338	223.355	120.486
45	Radojewice 29	Poland	52.75	18.417	10	This study	NA	NA	NA	NA	NA	NA	NA	NA	NA	NA	LBK	5300	4800		16	82.7575	Oder	1	1741.19	16.3941	-5.07921	223.268	119.718
46	Kuczkowo 5	Poland	52.733	18.617	8	This study	NA	NA	NA	NA	NA	NA	NA	NA	NA	NA	LBK	5100	4800		16	82.8782	Oder	1	7741.27	16.4024	-5.13481	223.516	118.801
47	Siniarzewo 1	Poland	52.733	18.683	4	This study	NA	NA	NA	NA	NA	NA	NA	NA	NA	NA	LBK	5200	5000		16	82.9022	Oder	1	4166.3	16.411	-5.17067	223.662	118.217
48	Kopydłowo 6	Poland	52.455	18.182	6	Roffet-Salque et al. 2015	9	Marciniak et al. 2017	NA	NA	NA	NA	NA	NA	NA	NA	LBK	5200	4800		16	82.977	Oder	1	3243.58	16.2979	-4.85316	224.167	122.886
49	Ludwinowo 7	Poland	52.565	19.004	71	Roffet-Salque et al. 2019	NA	NA	NA	NA	210	Kendall et al. 2019	210	Kendall et al. 2019	11	Kendall et al. 2019	LBK	5300	4850		16	82.4481	Vistula	1	2051.93	16.3668	-4.94609	224.298	118.577
50	Bodzia 1	Poland	52.703	18.888	10	This study	NA	NA	NA	NA	NA	NA	NA	NA	NA	NA	LBK	5300	5200		16	82.8078	Vistula	1	761.136	16.4135	-5.16898	224.068	117.443
51	Kruszyn 13	Poland	52.567	19	4	This study	NA	NA	NA	NA	NA	NA	NA	NA	NA	NA	LBK	5200	5000		16	82.4481	Vistula	1	1760.44	16.3671	-4.95705	224.237	118.644
52	Modlnica 5	Poland	50.119	19.869	5	This study	NA	NA	NA	NA	NA	NA	NA	NA	NA	NA	LBK	5100	5000		25	83.2555	Vistula	1	835.231	15.9885	-5.2989	222.165	130.322
53	Vrable-Veľké Lehemby	Slovakia	48.2	18.3086	NA	NA	18	Gillis et al. 2020	NA	NA	NA	NA	NA	NA	NA	NA	LBK	5250	5050		26	73.2323	Mid Danube	3	1106.58	15.6656	-4.96648	226.22	137.912
54	Balatonszárszó Kis-erdei-dűlő	Hungary	46.49	17.51	3	This study	60	Whittle et al. 2013b	4	Whittle et al. 2013b	79	Balasse et al. 2021	79	This study	13	This study	LBK	5335	4900		27	64.8492	Mid Danube	1	754.5	16.0526	-0.715202	238.875	162.79
55	Štúrovo	Slovakia	47.796	18.717	9	This study	NA	NA	NA	NA	NA	NA	NA	NA	NA	NA	LBK	5404	4781		27	69.6244	Mid Danube	8	926.249	15.7631	-4.34297	225.891	142.034
56	Tolna-Mözs-Községi-Csádés-földek	Hungary	46.23	18.45	6	This study	NA	NA	NA	NA	NA	NA	NA	NA	NA	NA	LBK				-	68.1025	Mid Danube	2	629	15.8912	-2.36259	228.829	153.501
57	Apc-Berekalja I	Hungary	47.792	19.703	9	This study	NA	NA	NA	NA	135	Balasse et al. 2021	135	This study	10	This study	LBK	5470	4950		28	72.9277	Mid Danube	4	1241.18	15.8275	-4.81812	223.456	140.916
58	Füzesabony-Gubakút	Hungary	47.731	20.413	7	This study	14	Whittle et al. 2013b	NA	NA	NA	NA	NA	NA	NA	NA	ALP	5432	5255		29	75.6736	Mid Danube	3	485.067	15.8645	-5.84343	219.303	137.311
59	Polgár-Ferenci-hát	Hungary	47.873	21.142	3	This study	13	Whittle et al. 2013b	NA	NA	NA	NA	NA	NA	NA	NA	ALP	5467	5344		30	68.8875	Mid Danube	2	4378.57	15.8688	-5.54777	219.923	139.273
60	Felsővadász-Várdomb	Hungary	48.37	20.92	2	This study	NA	NA	NA	NA	NA	NA	NA	NA	NA	NA	ALP			5000	31	68.9516	Mid Danube	1	220.452	15.8545	-5.0913	221.86	140.572
61	Garadna- Elkerülő út	Hungary	48.418	21.173	4	This study	NA	NA	NA	NA	NA	NA	NA	NA	NA	NA	ALP	5288	5030		32	74.2077	Mid Danube	2	282.793	15.865	-6.12011	218.249	136.608
References
1	Ilett, M. pers. comm.
2	Lanting, J. N.,Van der Plicht, J.2002. Palaeohistoria 43/44, 117-262.
3	Van de Velde, P. 2007. Analecta Praehistorica Leidensia 39, 205–222
4	Koschik, H. (ed.) 2004. Der bandkeramische Siedlungsplatz von Erkelenz-Kückhoven. - I Archäologie. Rheinische Ausgrabungen 54. (Mainz).
5	Claßen, E. 2011. Rheinische Ausgrabungen 64 (Darmstadt).
6	Zimmermann, A., Meurers-Balke, J., Kalis, A.J. 2006. In Urgeschichte im Rheinland. Jahrbuch 2005 des Rheinischen Vereins für Denkmalpflege und Landschaftsschutz, J. Kunow, H. H. Wegner, Eds. (Köln), pp. 159-202.
7	Boelicke, U. von Brandt, D., Lüning, L., Stehli, P. und Zimmermann, A. 1988. Rheinische Ausgrabungen 28 (Köln/Bonn)
8	Denaire, A. et al., 2017. Journal of Archaeological Method and Theory, 1-78
9	Reidhammer, K. 2019. In Ritualised Destruction in the Early Neolithic - -The expectional site of Herxheim (Palatinate, Germany), A. Zeeb-Lanz (Ed.). Pp.285-304.
10	Meyer, C., Lohr, C., Gronenborn, D., Alt, K.W. 2015. Proceedings of the National Academy of Sciences 112, 11217
11	Fritsch, B., Claßen, E., Müller, U., Dresely, V., 2008. Die linienbandkeramischen Gräberfelder von Derenburg »Meerenstieg II« und Halberstadt »Sonntagsfeld«, Lkr. Harz, Jahresschrift für mitteldeutsche Vorgeschichte Band 92
12	Brandt, G., Knipper, C. Nicklish, N., et al. 2014. In Early Farmers, The view from Archaeology and Science. Proceeding of the British Academy 198. pp. 95-114.
13	Pechtl, J. pers. comm.
14	Stäuble, H. pers. comm.
15	Tegel, W. Elburg, R., Hakelberg, D., Stäuble, H., Büntgen, U. 2012. PLoS ONE 7, e51374.
16	Pyzel, J. 2009. In Creating communities - New advances in Central Europe Neolithic research, D. Hofmann, P. Bickle, Eds. (Oxbow books, Oxford), pp. 71-79.
17	Řídký, J., Stolz, D., Zápotocká, M., 2008.Praehistorica 28, 177–236.
18	Rada, I., 1981. Archeologické rozhledy 33, 3–18.
19	Šumberová, R., 1991. Archaeol. Bohemia 194–195
20	Lenneis, E. Lüning, J. 2001. Die altbandkeramischen Siedlungen von Neckenmarkt und Strögen (Habelt, Bonn).
21	Vostrovská, I. 2018. Těšetice-Kyjovice - komunitní areál prvních zemědělcu. Nepublikovaná dizertačná práca, Filozofichá fakulta Masarykovej univerzity v Brne.
22	Stadler, P. Kotova, N. 2010. In Neolithization of the Carpathian basin: Northernmost distribution of the Starcevo/Körös Culture, J. Kozlowski, P. Raczky, Eds., pp. 325-348.
23	Griffin, S. 2013 In The first farmers of central Europe: diversity in LBK lifeways. A. W. R. Whittle, P. Bickle (Eds.) Pp. 443-457
24	Wild, E.M., Stadler, P., Häußer, A. et al. 2004. Radiocarbon 46(1), 377-385. doi:10.1017/S0033822200039680
25	Czekaj-Zastawny A, Przybyła M. 2012. Modlniczka 2, powiat krakowski – cmentarzysko kultury ceramiki wstęgowej rytej i osady neolityczne (= Via Archaeologica. Źródła z badań wykopaliskowych na trasie autostrady A4 w Małopolsce). Kraków: KZdBA
26	Meadows, J., Müller-Scheeßel, N. Cheben, I. et al. The Holocene 29 (10): 1653-1670.
27	Oross, K., Cramp, L., Gortav, G. et al. 2020. Quaternary International 560-561: 154-178.
28	Domboróczki, L. et al. 2016.Archaeologiai Értesítő 141, 1-27
29	Domboróczki, L. 2003. AGRIA XXXIX, 5-71.
30	Raczky, P. Anders, A. 2009. In Interactions between different models of neolithisation north of the Central European agro-ecological barrier. Papers presented on the symposium organized by the EU project FEPRE, J. Kozlowski, Ed. (Prace Komisji Prehistorii Karpat PAU Kraków), vol. 5, pp. 31-50.
31	Csengeri, P. pers. comm.
32	Csengeri, P.2014. Late groups of the Alföld Linear Pottery culture in north-eastern Hungary. Dissertationes Archaeologicae ex Instituto Archaeologico Universitatis de Rolando Eötvös nominatae 3, 501-517.

## Sheet: SI Table 2_FA_δ13C
Site no.	Site Name	Sample ID	δ13C16:0 (‰)	δ13Cdiet (‰)	lipid conc (µg.g-1)	Δ13C (‰)	Reference
1	Cuiry-lès-Chaudardes	CUI5713	-27.5468	-26.0468	330	-6.22	unpub.
1	Cuiry-lès-Chaudardes	CUI5708	-27.4168	-25.9168	881	-5.9	unpub.
1	Cuiry-lès-Chaudardes	CUI5725	-27.5168	-26.0168	3336	-5.33	unpub.
1	Cuiry-lès-Chaudardes	CUI5813	-27.73	-26.23	1371	-5.25	unpub.
1	Cuiry-lès-Chaudardes	CUI5777	-28.1368	-26.6368	212	-5.09	unpub.
1	Cuiry-lès-Chaudardes	CUI2011	-28.7768	-27.2768	365	-5.08	unpub.
1	Cuiry-lès-Chaudardes	CUI5765	-29.8368	-28.3368	5416	-5.06	unpub.
1	Cuiry-lès-Chaudardes	CUI5801	-29.0668	-27.5668	9886	-5.05	unpub.
1	Cuiry-lès-Chaudardes	CUI5753	-28.9168	-27.4168	164	-5.05	unpub.
1	Cuiry-lès-Chaudardes	CUI5795	-27.92	-26.42	485	-4.85	unpub.
1	Cuiry-lès-Chaudardes	CUI5735	-29.9068	-28.4068	3417	-4.84	unpub.
1	Cuiry-lès-Chaudardes	CUI5800	-29.8568	-28.3568	12693	-4.74	unpub.
1	Cuiry-lès-Chaudardes	CUI5726	-28.8568	-27.3568	584	-4.71	unpub.
1	Cuiry-lès-Chaudardes	CUI5731	-27.4468	-25.9468	501	-4.57	unpub.
1	Cuiry-lès-Chaudardes	CUI5740	-28.63	-27.13	760	-4.49	unpub.
1	Cuiry-lès-Chaudardes	CUI5787	-32.08	-30.58	1893	-4.47	unpub.
1	Cuiry-lès-Chaudardes	CUI5775	-29.66	-28.16	216	-4.39	unpub.
1	Cuiry-lès-Chaudardes	CUI5758	-29.0468	-27.5468	29778	-4.37	unpub.
1	Cuiry-lès-Chaudardes	CUI2033	-30.9568	-29.4568	185	-4.37	unpub.
1	Cuiry-lès-Chaudardes	CUI5788	-28.5	-27	236	-4.36	unpub.
1	Cuiry-lès-Chaudardes	CUI5785	-27.5	-26	189	-4.21	unpub.
1	Cuiry-lès-Chaudardes	CUI5790	-27.0468	-25.5468	135	-4.13	unpub.
1	Cuiry-lès-Chaudardes	CUI5780	-29.0668	-27.5668	594	-4.02	unpub.
1	Cuiry-lès-Chaudardes	CUI5806	-29.84	-28.34	56	-3.96	unpub.
1	Cuiry-lès-Chaudardes	CUI5744	-29.3468	-27.8468	456	-3.95	unpub.
1	Cuiry-lès-Chaudardes	CUI5751	-27.85	-26.35	238	-3.95	unpub.
1	Cuiry-lès-Chaudardes	CUI5807	-29.29	-27.79	90	-3.7	unpub.
1	Cuiry-lès-Chaudardes	CUI2022	-30.5768	-29.0768	1229	-3.68	unpub.
1	Cuiry-lès-Chaudardes	CUI2013	-30.1068	-28.6068	179	-3.64	unpub.
1	Cuiry-lès-Chaudardes	CUI5759	-29.9768	-28.4768	2514	-3.58	unpub.
1	Cuiry-lès-Chaudardes	CUI5749	-27.79	-26.29	782	-3.55	unpub.
1	Cuiry-lès-Chaudardes	CUI5742	-28.1168	-26.6168	865	-3.53	unpub.
1	Cuiry-lès-Chaudardes	CUI5808	-27.11	-25.61	271	-3.47	unpub.
1	Cuiry-lès-Chaudardes	CUI5743	-29.6068	-28.1068	2015	-3.44	unpub.
1	Cuiry-lès-Chaudardes	CUI5791	-28.9468	-27.4468	911	-3.43	unpub.
1	Cuiry-lès-Chaudardes	CUI5774	-28.8568	-27.3568	539	-3.41	unpub.
1	Cuiry-lès-Chaudardes	CUI5798	-30.3868	-28.8868	22	-3.4	unpub.
1	Cuiry-lès-Chaudardes	CUI5705	-30.05	-28.55	407	-3.38	unpub.
1	Cuiry-lès-Chaudardes	CUI5707	-29.3568	-27.8568	19	-3.38	unpub.
1	Cuiry-lès-Chaudardes	CUI5776	-31.0468	-29.5468	3531	-3.36	unpub.
1	Cuiry-lès-Chaudardes	CUI5755	-27.78	-26.28	207	-3.36	unpub.
1	Cuiry-lès-Chaudardes	CUI5817	-28.91	-27.41	53	-3.32	unpub.
1	Cuiry-lès-Chaudardes	CUI2036	-29.4568	-27.9568	579	-3.28	unpub.
1	Cuiry-lès-Chaudardes	CUI5767	-30.63	-29.13	2137	-3.18	unpub.
1	Cuiry-lès-Chaudardes	CUI2015	-31.2968	-29.7968	341	-3.15	unpub.
1	Cuiry-lès-Chaudardes	CUI5704	-30.81	-29.31	645	-3.14	unpub.
1	Cuiry-lès-Chaudardes	CUI5737	-28.94	-27.44	110	-3.14	unpub.
1	Cuiry-lès-Chaudardes	CUI5760	-29.8568	-28.3568	1328	-3.11	unpub.
1	Cuiry-lès-Chaudardes	CUI2018	-31.2568	-29.7568	5110	-3.1	unpub.
2	Maastricht-Cannerberg	MAC3041	-29.5768	-28.0768	2153.9	-3.38	unpub.
2	Maastricht-Cannerberg	MAC3042	-29.8968	-28.3968	81.1	-3.29	unpub.
3	Maastricht-Klinkers	MAK3093	-29.0068	-27.5068	1304.5	-4.05	unpub.
3	Maastricht-Klinkers	MAK3091	-29.9368	-28.4368	179.4	-3.75	unpub.
3	Maastricht-Klinkers	MAK3148	-28.7468	-27.2468	352.4	-3.57	unpub.
3	Maastricht-Klinkers	MAK3099	-29.7068	-28.2068	494.1	-3.43	unpub.
3	Maastricht-Klinkers	MAK3152	-28.0668	-26.5668	820.3	-3.22	unpub.
4	Geleen-Janskamperveld	GEL3237	-29.0668	-27.5668	21	-5.04	unpub.
4	Geleen-Janskamperveld	GEL3207	-29.8868	-28.3868	52	-4.93	unpub.
4	Geleen-Janskamperveld	GEL3257	-27.3868	-25.8868	254	-4.51	unpub.
4	Geleen-Janskamperveld	GEL3252	-27.7968	-26.2968	64	-4.39	unpub.
4	Geleen-Janskamperveld	GEL3332	-30.07	-28.57	21	-4.34	unpub.
4	Geleen-Janskamperveld	GEL3351	-28.5668	-27.0668	82	-4.19	unpub.
4	Geleen-Janskamperveld	GEL3312	-31.8868	-30.3868	18	-4.15	unpub.
4	Geleen-Janskamperveld	GEL3228	-30.5068	-29.0068	95	-3.88	unpub.
4	Geleen-Janskamperveld	GEL3347	-30.2568	-28.7568	187	-3.8	unpub.
4	Geleen-Janskamperveld	GEL3282	-27.8968	-26.3968	19	-3.45	unpub.
4	Geleen-Janskamperveld	GEL3276	-32.6568	-31.1568	339	-3.39	unpub.
4	Geleen-Janskamperveld	GEL3215	-28.1168	-26.6168	52	-3.34	unpub.
4	Geleen-Janskamperveld	GEL3251	-29.86	-28.36	27	-3.3	unpub.
4	Geleen-Janskamperveld	GEL3226	-28.37	-26.87	31	-3.24	unpub.
4	Geleen-Janskamperveld	GEL3266	-29.5768	-28.0768	37	-3.24	unpub.
4	Geleen-Janskamperveld	GEL3271	-31.2168	-29.7168	1260	-3.15	unpub.
4	Geleen-Janskamperveld	GEL3219	-28.9868	-27.4868	29	-3.14	unpub.
4	Geleen-Janskamperveld	GEL3277	-31.8	-30.3	76	-3.14	unpub.
4	Geleen-Janskamperveld	GEL3316	-29.8768	-28.3768	523	-3.13	unpub.
4	Geleen-Janskamperveld	GEL3278	-29.5868	-28.0868	41	-3.1	unpub.
5	Erkelenz-Kückhoven	KUK5473	-24.8668	-23.3668	\N	-3.2	unpub.
6	Konigshoven 14 (FR 5)	KON5589	-30.8668	-29.3668	\N	-4.11	unpub.
6	Konigshoven 14 (FR 5)	KON5598	-31.8268	-30.3268	\N	-4.08	unpub.
6	Konigshoven 14 (FR 5)	KON5585	-31.7068	-30.2068	\N	-4.02	unpub.
6	Konigshoven 14 (FR 5)	KON5615	-31.7368	-30.2368	\N	-3.82	unpub.
6	Konigshoven 14 (FR 5)	KON5592	-31.1968	-29.6968	\N	-3.7	unpub.
6	Konigshoven 14 (FR 5)	KON5566	-30.1468	-28.6468	\N	-3.55	unpub.
6	Konigshoven 14 (FR 5)	KON5559	-29.2768	-27.7768	\N	-3.51	unpub.
6	Konigshoven 14 (FR 5)	KON5555	-28.9968	-27.4968	\N	-3.43	unpub.
6	Konigshoven 14 (FR 5)	KON5617	-29.3168	-27.8168	\N	-3.39	unpub.
6	Konigshoven 14 (FR 5)	KON5587	-29.0868	-27.5868	\N	-3.15	unpub.
6	Konigshoven 14 (FR 5)	KON5565	-28.5368	-27.0368	\N	-3.15	unpub.
7	Langweiler 8	LGW5532	-27.2168	-25.7168	288	-3.72	unpub.
7	Langweiler 8	LGW5531	-28.6968	-27.1968	516.9	-3.7	unpub.
7	Langweiler 8	LGW5537	-26.4368	-24.9368	54.9	-3.64	unpub.
7	Langweiler 8	LGW5517	-29.4268	-27.9268	113.8	-3.19	unpub.
7	Langweiler 8	LGW5535	-27.9068	-26.4068	171.7	-3.18	unpub.
8	Ensisheim-Ratfeld	ENS5933	-29.0668	-27.5668	\N	-4.71	Casanova_et_al_2020
8	Ensisheim-Ratfeld	ENS5950	-27.9568	-26.4568	\N	-4.62	Casanova_et_al_2020
8	Ensisheim-Ratfeld	ENS5991	-27.1368	-25.6368	\N	-4.54	Casanova_et_al_2020
8	Ensisheim-Ratfeld	ENS5930	-26.2968	-24.7968	\N	-4.42	Casanova_et_al_2020
8	Ensisheim-Ratfeld	ENS5917	-27.8368	-26.3368	\N	-4.13	Casanova_et_al_2020
8	Ensisheim-Ratfeld	ENS5970	-26.5368	-25.0368	\N	-4.02	Casanova_et_al_2020
8	Ensisheim-Ratfeld	ENS6002	-27.8068	-26.3068	\N	-3.95	Casanova_et_al_2020
8	Ensisheim-Ratfeld	ENS5919	-29.5768	-28.0768	\N	-3.84	Casanova_et_al_2020
8	Ensisheim-Ratfeld	ENS5932	-27.1968	-25.6968	\N	-3.82	Casanova_et_al_2020
8	Ensisheim-Ratfeld	ENS5929	-28.4968	-26.9968	\N	-3.78	Casanova_et_al_2020
8	Ensisheim-Ratfeld	ENS5965	-27.5768	-26.0768	\N	-3.6	Casanova_et_al_2020
8	Ensisheim-Ratfeld	ENS5928	-26.1268	-24.6268	\N	-3.58	Casanova_et_al_2020
8	Ensisheim-Ratfeld	ENS5913	-28.1868	-26.6868	\N	-3.57	Casanova_et_al_2020
8	Ensisheim-Ratfeld	ENS5934	-26.9968	-25.4968	\N	-3.52	Casanova_et_al_2020
8	Ensisheim-Ratfeld	ENS5944	-27.8268	-26.3268	\N	-3.46	Casanova_et_al_2020
8	Ensisheim-Ratfeld	ENS5971	-27.0168	-25.5168	\N	-3.26	Casanova_et_al_2020
8	Ensisheim-Ratfeld	ENS5915	-27.2768	-25.7768	\N	-3.19	Casanova_et_al_2020
8	Ensisheim-Ratfeld	ENS5969	-27.4368	-25.9368	\N	-3.19	Casanova_et_al_2020
8	Ensisheim-Ratfeld	ENS5954	-28.4068	-26.9068	\N	-3.16	Casanova_et_al_2020
9	Colmar	COL6118	-26.5868	-25.0868	\N	-4.65	Casanova_et_al_2020
9	Colmar	COL6060	-26.7668	-25.2668	\N	-3.32	Casanova_et_al_2020
10	Sierentz	SIE5374	-28.7468	-27.2468	\N	-4.8	Casanova_et_al_2020
10	Sierentz	SIE5397	-24.3468	-22.8468	\N	-4.8	Casanova_et_al_2020
10	Sierentz	SIE5426	-29.1468	-27.6468	\N	-4.7	Casanova_et_al_2020
10	Sierentz	SIE5363	-29.2	-27.7	\N	-4.4	Casanova_et_al_2020
10	Sierentz	SIE5362	-27.5	-26	\N	-4.2	Casanova_et_al_2020
10	Sierentz	SIE5345	-28.5468	-27.0468	\N	-4	Casanova_et_al_2020
10	Sierentz	SIE5371	-26.8	-25.3	\N	-4	Casanova_et_al_2020
10	Sierentz	SIE5416	-28.6468	-27.1468	\N	-3.9	Casanova_et_al_2020
10	Sierentz	SIE5410	-28.3468	-26.8468	\N	-3.8	Casanova_et_al_2020
10	Sierentz	SIE5393	-27.1468	-25.6468	\N	-3.7	Casanova_et_al_2020
10	Sierentz	SIE5430	-28.5468	-27.0468	\N	-3.6	Casanova_et_al_2020
10	Sierentz	SIE5405	-29.0468	-27.5468	\N	-3.4	Casanova_et_al_2020
10	Sierentz	SIE5381	-27.8468	-26.3468	\N	-3.4	Casanova_et_al_2020
10	Sierentz	SIE5372	-30.3468	-28.8468	\N	-3.2	Casanova_et_al_2020
10	Sierentz	SIE5392	-29.5468	-28.0468	\N	-3.2	Casanova_et_al_2020
10	Sierentz	SIE5355	-27.8468	-26.3468	\N	-3.1	Casanova_et_al_2020
10	Sierentz	SIE5394	-28.8468	-27.3468	\N	-3.1	Casanova_et_al_2020
10	Sierentz	SIE5438	-29.9468	-28.4468	\N	-3.1	Casanova_et_al_2020
10	Sierentz	SIE5346	-28.9468	-27.4468	\N	-3.1	Casanova_et_al_2020
10	Sierentz	SIE5437	-30.0468	-28.5468	\N	-3.1	Casanova_et_al_2020
11	Bischoffsheim	BIS4527	-31.7468	-30.2468	\N	-4.1	Casanova_et_al_2020
11	Bischoffsheim	BIS4544	-28.0468	-26.5468	\N	-3.9	Casanova_et_al_2020
11	Bischoffsheim	BIS4528	-31.1468	-29.6468	\N	-3.8	Casanova_et_al_2020
11	Bischoffsheim	BIS4514	-28.4468	-26.9468	\N	-3.8	Casanova_et_al_2020
11	Bischoffsheim	BIS5210	-28.2468	-26.7468	\N	-3.2	Casanova_et_al_2020
13	Kilianstädten	KIL3454	-22.57	-21.07	\N	-3.89	unpub.
16	Dillingen-Steinheim	DST4889	-26.7268	-25.2268	228	-3.14	unpub.
20	Altscherbitz	SK6298	-28.48	-26.98	75	-3.66	unpub.
20	Altscherbitz	SK6316	-27.84	-26.34	185	-3.1	unpub.
21	Brodau	BOU0659	-26.4468	-24.9468	\N	-5.5	Salque_et_al_2012
21	Brodau	BOU0656	-29.3468	-27.8468	\N	-4.5	Salque_et_al_2012
21	Brodau	BOU0653	-27.8468	-26.3468	\N	-3.2	Salque_et_al_2012
24	Stephansposching	STE4800	-27.25	-25.75	13.8	-3.69	unpub.
26	Płonia 2	PLO3773	-27.34	-25.84	154.2	-3.55	unpub.
26	Płonia 2	PLO3771	-27.69	-26.19	119.7	-3.25	unpub.
27	Płonia 2	PLO3774	-26.0968	-24.5968	141.5	-3.19	unpub.
27	Brzezin 7	BRZ3582	-25.9	-24.4	42.2	-3.54	unpub.
27	Brzezin 7	BRZ3588	-26.94	-25.44	28.2	-3.4	unpub.
27	Brzezin 7	BRZ3589	-27.01	-25.51	17.3	-3.21	unpub.
28	Karwowo 1	KAR3682	-27.1968	-25.6968	53.2	-6.28	unpub.
28	Karwowo 1	KAR3638	-25.6868	-24.1868	12	-5.1	unpub.
28	Karwowo 1	KAR3633	-26.6168	-25.1168	795.4	-4.43	unpub.
28	Karwowo 1	KAR3677	-27.2968	-25.7968	1900	-4.27	unpub.
28	Karwowo 1	KAR3674	-26.9568	-25.4568	18.5	-3.8	unpub.
28	Karwowo 1	KAR3675	-26.7968	-25.2968	27.9	-3.75	unpub.
28	Karwowo 1	KAR3641	-26.6268	-25.1268	27.4	-3.51	unpub.
28	Karwowo 1	KAR3651	-27.4268	-25.9268	350.7	-3.37	unpub.
28	Karwowo 1	KAR3664	-26.3268	-24.8268	28.4	-3.14	unpub.
29	Żalęcino	ZAL1151	-26.53	-25.03	\N	-5.69	unpub.
30	Żuków	ZUK1168	-27.24	-25.74	\N	-4.3	unpub.
32	Bylany	BYLC1474	-26.1468	-24.6468	166	-3.1	Matlova_et_al_2017
32	Bylany	BYLC1539	-24.6468	-23.1468	245	-6.5	unpub.
32	Bylany	BYLC1200	-27.5468	-26.0468	372	-3.6	Brychova_et_al_2021
32	Bylany	BYLC1212	-28.5468	-27.0468	216	-3.4	Brychova_et_al_2021
32	Bylany	BYLC1202	-26.8468	-25.3468	394	-3.1	Brychova_et_al_2021
32	Bylany	BYLC1518	-26.4468	-24.9468	47	-3.1	Brychova_et_al_2021
34	Stroegen	STG2776	-27.4768	-25.9768	27.6	-5.5	unpub.
34	Stroegen	STG2754	-27.44	-25.94	26	-3.6	unpub.
35	Těšetice-Sutny	TES2685	-25.3868	-23.8868	120.8	-3.37	unpub.
36	Brunn am Gebirge	BRN2886	-27.3368	-25.8368	\N	-3.21	unpub.
36	Brunn am Gebirge	BRN2892	-28.4968	-26.9968	\N	-3.2	unpub.
41	Chabsko 24	CHA3619	-27.4268	-25.9268	12.4	-5.07	unpub.
41	Chabsko 24	CHA3604	-25.6568	-24.1568	1375.5	-3.26	unpub.
42	Żegotki	ZEG3922	-26.67	-25.17	50.4	-5.11	unpub.
42	Żegotki	ZEG3929	-27.05	-25.55	696.6	-4.25	unpub.
42	Żegotki	ZEG3972	-24.89	-23.39	34.3	-3.91	unpub.
42	Żegotki	ZEG3963	-25.4468	-23.9468	143.9	-3.2	unpub.
42	Żegotki	ZEG3955	-24.85	-23.35	10.2	-3.19	unpub.
42	Żegotki	ZEG3921	-26.53	-25.03	76.4	-3.18	unpub.
42	Żegotki	ZEG3928	-26.98	-25.48	470.1	-3.1	unpub.
43	Bożejewice 22/23	BOZ3552	-26.92	-25.42	68.7	-5.69	unpub.
43	Bożejewice 22/23	BOZ3544	-26.79	-25.29	15.5	-5.63	unpub.
43	Bożejewice 22/23	BOZ3550	-26.47	-24.97	17.6	-5.34	unpub.
43	Bożejewice 22/23	BOZ3532	-26.84	-25.34	15.4	-4.57	unpub.
43	Bożejewice 22/23	BOZ3539	-27.64	-26.14	80.8	-3.18	unpub.
44	Rożniaty 2	ROZ3847	-27.4768	-25.9768	1736.2	-3.77	unpub.
44	Rożniaty 2	ROZ3836	-27.37	-25.87	99.3	-3.65	unpub.
45	Radojewice	RAD3813	-26.78	-25.28	1021.9	-6.02	unpub.
45	Radojewice	RAD3821	-26.36	-24.86	7.9	-5.64	unpub.
45	Radojewice	RAD3808	-26.64	-25.14	913	-5.48	unpub.
45	Radojewice	RAD3794	-25.8068	-24.3068	1198	-5.45	unpub.
45	Radojewice	RAD3818	-26.65	-25.15	94.2	-5.06	unpub.
45	Radojewice	RAD3810	-25.97	-24.47	587.7	-4.61	unpub.
45	Radojewice	RAD3815	-27.22	-25.72	44.5	-3.82	unpub.
45	Radojewice	RAD3798	-27.04	-25.54	30.5	-3.43	unpub.
45	Radojewice	RAD3817	-26.5	-25	4650.1	-3.42	unpub.
45	Radojewice	RAD3816	-27.55	-26.05	18.4	-3.16	unpub.
46	Kuczkowo	KUC3756	-26.96	-25.46	45.9	-5.5	unpub.
46	Kuczkowo	KUC3760	-26.27	-24.77	69.7	-4.33	unpub.
46	Kuczkowo	KUC3755	-26.52	-25.02	19980	-4.29	unpub.
46	Kuczkowo	KUC3757	-27.23	-25.73	153.9	-4	unpub.
46	Kuczkowo	KUC3761	-27.07	-25.57	61.6	-3.64	unpub.
46	Kuczkowo	KUC3764	-27.08	-25.58	31	-3.58	unpub.
46	Kuczkowo	KUC3751	-26.29	-24.79	910.2	-3.53	unpub.
46	Kuczkowo	KUC3758	-26.41	-24.91	218.1	-3.2	unpub.
47	Siniarzewo 1	SIN3882	-26.34	-24.84	77.2	-4.79	unpub.
47	Siniarzewo 1	SIN3893	-26.51	-25.01	153.2	-4.53	unpub.
47	Siniarzewo 1	SIN3884	-27.51	-26.01	33.8	-3.85	unpub.
47	Siniarzewo 1	SIN3890	-27.31	-25.81	14.3	-3.18	unpub.
48	Kopydłowo	KOP2921	-26.8468	-25.3468	\N	-5.7	Roffet-Salque_et_al_2015
48	Kopydłowo	KOP3711	-26.67	-25.17	360.7	-4.95	Roffet-Salque_et_al_2015
48	Kopydłowo	KOP3695	-26.67	-25.17	26.5	-4.88	Roffet-Salque_et_al_2015
48	Kopydłowo	KOP3703	-27.37	-25.87	80	-4.59	Roffet-Salque_et_al_2015
48	Kopydłowo	KOP2928	-27.3468	-25.8468	\N	-4.5	Roffet-Salque_et_al_2015
48	Kopydłowo	KOP2949	-26.3468	-24.8468	\N	-3.9	Roffet-Salque_et_al_2015
49	Ludwinowo 7	LDW0792	-26.8468	-25.3468	260	-6.3	Salque_et_al_2013
49	Ludwinowo 7	LDW2358	-26.3868	-24.8868	64.3	-6.23	Roffet-Salque_et_al_2019
49	Ludwinowo 7	LDW0793	-27.2468	-25.7468	875	-6.2	Salque_et_al_2013
49	Ludwinowo 7	LDW0795	-27.0468	-25.5468	592	-6.2	Salque_et_al_2013
49	Ludwinowo 7	LDW2332	-27.4368	-25.9368	852.6	-6.16	Roffet-Salque_et_al_2019
49	Ludwinowo 7	LDW2414	-26.73	-25.23	526.9	-5.91	Roffet-Salque_et_al_2019
49	Ludwinowo 7	LDW0790	-26.5468	-25.0468	197	-5.9	Salque_et_al_2013
49	Ludwinowo 7	LDW0794	-27.3468	-25.8468	514	-5.9	Salque_et_al_2013
49	Ludwinowo 7	LDW2356	-26.7868	-25.2868	358.5	-5.84	Roffet-Salque_et_al_2019
49	Ludwinowo 7	LDW2485	-27.05	-25.55	3620.9	-5.71	Roffet-Salque_et_al_2019
49	Ludwinowo 7	LDW0766	-26.7468	-25.2468	3	-5.6	Salque_et_al_2013
49	Ludwinowo 7	LDW2554	-26.8568	-25.3568	1090.7	-5.6	Roffet-Salque_et_al_2019
49	Ludwinowo 7	LDW2336	-26.6868	-25.1868	168	-5.59	Roffet-Salque_et_al_2019
49	Ludwinowo 7	LDW2339	-27.1068	-25.6068	203.5	-5.56	Roffet-Salque_et_al_2019
49	Ludwinowo 7	LDW2386	-27.2368	-25.7368	177.2	-5.51	Roffet-Salque_et_al_2019
49	Ludwinowo 7	LDW2229	-26.2868	-24.7868	2358.6	-5.47	Roffet-Salque_et_al_2019
49	Ludwinowo 7	LDW0768	-28.1468	-26.6468	141	-5.4	Salque_et_al_2013
49	Ludwinowo 7	LDW0769	-28.0468	-26.5468	95	-5.4	Salque_et_al_2013
49	Ludwinowo 7	LDW0789	-27.4468	-25.9468	15	-5.4	Salque_et_al_2013
49	Ludwinowo 7	LDW2238	-26.4468	-24.9468	56.3	-5.23	Roffet-Salque_et_al_2019
49	Ludwinowo 7	LDW2353	-26.3568	-24.8568	9.5	-5.01	Roffet-Salque_et_al_2019
49	Ludwinowo 7	LDW2385	-27.3868	-25.8868	40.5	-4.95	Roffet-Salque_et_al_2019
49	Ludwinowo 7	LDW0772	-27.9468	-26.4468	3	-4.9	Salque_et_al_2013
49	Ludwinowo 7	LDW2573	-27.8668	-26.3668	281.5	-4.82	Roffet-Salque_et_al_2019
49	Ludwinowo 7	LDW0762	-26.9468	-25.4468	1	-4.7	Salque_et_al_2013
49	Ludwinowo 7	LDW0773	-27.5468	-26.0468	9	-4.7	Salque_et_al_2013
49	Ludwinowo 7	LDW2363	-26.8268	-25.3268	1015.4	-4.53	Roffet-Salque_et_al_2019
49	Ludwinowo 7	LDW2484	-27.78	-26.28	10.3	-4.52	Roffet-Salque_et_al_2019
49	Ludwinowo 7	LDW2453	-26.1268	-24.6268	2244.7	-4.41	Roffet-Salque_et_al_2019
49	Ludwinowo 7	LDW1060	-27.9468	-26.4468	23	-4.4	Salque_et_al_2013
49	Ludwinowo 7	LDW2310	-27.3068	-25.8068	12	-4.34	Roffet-Salque_et_al_2019
49	Ludwinowo 7	LDW2579	-27.7668	-26.2668	447	-4.33	Roffet-Salque_et_al_2019
49	Ludwinowo 7	LDW2473	-27.0068	-25.5068	1369.4	-4.27	Roffet-Salque_et_al_2019
49	Ludwinowo 7	LDW2532	-28.24	-26.74	80.2	-4.23	Roffet-Salque_et_al_2019
49	Ludwinowo 7	LDW1055	-28.9468	-27.4468	4	-4.1	Salque_et_al_2013
49	Ludwinowo 7	LDW2217	-25.6368	-24.1368	113.8	-4.03	Roffet-Salque_et_al_2019
49	Ludwinowo 7	LDW2272	-26.5268	-25.0268	1627.6	-4.03	Roffet-Salque_et_al_2019
49	Ludwinowo 7	LDW2507	-26.45	-24.95	112.4	-3.93	Roffet-Salque_et_al_2019
49	Ludwinowo 7	LDW2446	-27.6968	-26.1968	167.7	-3.89	Roffet-Salque_et_al_2019
49	Ludwinowo 7	LDW2465	-27.2068	-25.7068	164.2	-3.85	Roffet-Salque_et_al_2019
49	Ludwinowo 7	LDW1077	-26.9368	-25.4368	704.1	-3.77	Salque_et_al_2013
49	Ludwinowo 7	LDW2533	-27.35	-25.85	116.3	-3.77	Roffet-Salque_et_al_2019
49	Ludwinowo 7	LDW2551	-25.7068	-24.2068	30.4	-3.75	Roffet-Salque_et_al_2019
49	Ludwinowo 7	LDW2388	-27.3468	-25.8468	822.6	-3.74	Roffet-Salque_et_al_2019
49	Ludwinowo 7	LDW2539	-26.23	-24.73	135.6	-3.71	Roffet-Salque_et_al_2019
49	Ludwinowo 7	LDW1026	-27.4468	-25.9468	21	-3.7	Salque_et_al_2013
49	Ludwinowo 7	LDW2337	-26.8968	-25.3968	65.5	-3.68	Roffet-Salque_et_al_2019
49	Ludwinowo 7	LDW2591	-27.14	-25.64	272.7	-3.66	Roffet-Salque_et_al_2019
49	Ludwinowo 7	LDW2322	-27.0368	-25.5368	35.7	-3.61	Roffet-Salque_et_al_2019
49	Ludwinowo 7	LDW2301	-26.3668	-24.8668	124.9	-3.6	Roffet-Salque_et_al_2019
49	Ludwinowo 7	LDW2312	-26.7268	-25.2268	117.9	-3.58	Roffet-Salque_et_al_2019
49	Ludwinowo 7	LDW2235	-25.8268	-24.3268	35	-3.57	Roffet-Salque_et_al_2019
49	Ludwinowo 7	LDW2240	-27.1068	-25.6068	111.2	-3.56	Roffet-Salque_et_al_2019
49	Ludwinowo 7	LDW2398	-28.0468	-26.5468	6.4	-3.45	Roffet-Salque_et_al_2019
49	Ludwinowo 7	LDW1078	-27.3168	-25.8168	57.2	-3.43	Salque_et_al_2013
49	Ludwinowo 7	LDW6982	-26.81	-25.31	4280	-3.41	Roffet-Salque_et_al_2019
49	Ludwinowo 7	LDW1030	-27.4468	-25.9468	73	-3.4	Salque_et_al_2013
49	Ludwinowo 7	LDW2347	-26.5668	-25.0668	22.3	-3.38	Roffet-Salque_et_al_2019
49	Ludwinowo 7	LDW1039	-26.9468	-25.4468	64	-3.3	Salque_et_al_2013
49	Ludwinowo 7	LDW6988	-25.9	-24.4	616	-3.29	Roffet-Salque_et_al_2019
49	Ludwinowo 7	LDW2266	-26.4468	-24.9468	673.6	-3.27	Roffet-Salque_et_al_2019
49	Ludwinowo 7	LDW2241	-26.4268	-24.9268	741.5	-3.22	Roffet-Salque_et_al_2019
49	Ludwinowo 7	LDW6999	-28.35	-26.85	36	-3.22	Roffet-Salque_et_al_2019
49	Ludwinowo 7	LDW1010	-27.3468	-25.8468	111	-3.2	Salque_et_al_2013
49	Ludwinowo 7	LDW1036	-25.6468	-24.1468	20	-3.2	Salque_et_al_2013
49	Ludwinowo 7	LDW1049	-27.5468	-26.0468	391	-3.2	Salque_et_al_2013
49	Ludwinowo 7	LDW2273	-28.4168	-26.9168	63.7	-3.19	Roffet-Salque_et_al_2019
49	Ludwinowo 7	LDW2568	-27.8868	-26.3868	168.1	-3.17	Roffet-Salque_et_al_2019
49	Ludwinowo 7	LDW2281	-27.0768	-25.5768	3.9	-3.17	Roffet-Salque_et_al_2019
49	Ludwinowo 7	LDW1013	-27.3468	-25.8468	49	-3.1	Salque_et_al_2013
49	Ludwinowo 7	LDW1023	-27.3468	-25.8468	403	-3.1	Salque_et_al_2013
50	Bodzia site 1	BOD3476	-28.2268	-26.7268	164.8	-5.57	unpub.
50	Bodzia site 1	BOD3500	-26.3468	-24.8468	63.8	-4.9	unpub.
50	Bodzia site 1	BOD6721	-27.73	-26.23	30.8	-3.78	unpub.
50	Bodzia site 1	BOD3471	-27.1768	-25.6768	123.7	-3.55	unpub.
50	Bodzia site 1	BOD3480	-26.5568	-25.0568	129.3	-3.51	unpub.
50	Bodzia site 1	BOD3472	-26.8968	-25.3968	87.1	-3.34	unpub.
50	Bodzia site 1	BOD3490	-26.3068	-24.8068	94.2	-3.29	unpub.
50	Bodzia site 1	BOD3519	-25.99	-24.49	71.4	-3.18	unpub.
50	Bodzia site 1	BOD3474	-26.9668	-25.4668	1542.5	-3.17	unpub.
50	Bodzia site 1	BOD3515	-26.9568	-25.4568	115.1	-3.14	unpub.
51	Kruszyn 13	KRU3734	-26.5	-25	93.6	-4.97	unpub.
51	Kruszyn 13	KRU3741	-27.71	-26.21	161.2	-4.01	unpub.
51	Kruszyn 13	KRU3743	-27.91	-26.41	2419	-3.21	unpub.
51	Kruszyn 13	KRU3726	-27.9	-26.4	25.3	-3.16	unpub.
52	Modlnica 5	MOD1314	-25.2468	-23.7468	7162	-4.1	unpub.
52	Modlnica 5	MOD1236	-27.2468	-25.7468	8514	-3.7	unpub.
52	Modlnica 5	MOD1234	-27.4468	-25.9468	9757	-3.4	unpub.
52	Modlnica 5	MOD1280	-26.8468	-25.3468	954	-3.3	unpub.
52	Modlnica 5	MOD1269	-27.7468	-26.2468	1298	-3.2	unpub.
54	Balatonszárszó	BAL6615	-27.61	-26.11	\N	-5.08	unpub.
54	Balatonszárszó	BAL6614	-26.72	-25.22	\N	-4.16	unpub.
54	Balatonszárszó	BAL6625	-27	-25.5	\N	-3.11	unpub.
55	Štúrovo	STU2663	-26.83	-25.33	\N	-5.97	unpub.
55	Štúrovo	STU2610	-26.7268	-25.2268	\N	-5.18	unpub.
55	Štúrovo	STU2659	-26.73	-25.23	\N	-5.06	unpub.
55	Štúrovo	STU2661	-26.87	-25.37	\N	-4.45	unpub.
55	Štúrovo	STU2611	-27.3468	-25.8468	\N	-4.26	unpub.
55	Štúrovo	STU2633	-26.3168	-24.8168	\N	-4.21	unpub.
55	Štúrovo	STU2628	-26.6668	-25.1668	\N	-4.01	unpub.
55	Štúrovo	STU2637	-25.1068	-23.6068	\N	-3.72	unpub.
55	Štúrovo	STU2618	-26.2568	-24.7568	\N	-3.62	unpub.
56	Tolna-Mözs-Községi Csádés földek	TOL6933	-27.45	-25.95	\N	-4.77	unpub.
56	Tolna-Mözs-Községi Csádés földek	TOL6931	-26.91	-25.41	\N	-4.31	unpub.
56	Tolna-Mözs-Községi Csádés földek	TOL6957	-26.93	-25.43	\N	-3.68	unpub.
56	Tolna-Mözs-Községi Csádés földek	TOL6966	-27.26	-25.76	\N	-3.49	unpub.
56	Tolna-Mözs-Községi Csádés földek	TOL6905	-27.27	-25.77	\N	-3.41	unpub.
56	Tolna-Mözs-Községi Csádés földek	TOL6967	-27.17	-25.67	\N	-3.26	unpub.
57	Apc-Berekalja I	APCC1125	-26.9468	-25.4468	481	-5.02	unpub.
57	Apc-Berekalja I	APC4200	-27.2568	-25.7568	590	-4.68	unpub.
57	Apc-Berekalja I	APCC1135	-28.0868	-26.5868	99	-4.46	unpub.
57	Apc-Berekalja I	APC4217	-27.5168	-26.0168	653	-4.41	unpub.
57	Apc-Berekalja I	APC4199	-27.4968	-25.9968	36	-4.16	unpub.
57	Apc-Berekalja I	APC4215	-27.9468	-26.4468	191	-4.06	unpub.
57	Apc-Berekalja I	APC4220	-27.3368	-25.8368	41	-3.77	unpub.
57	Apc-Berekalja I	APC4263	-28.2268	-26.7268	858	-3.52	unpub.
57	Apc-Berekalja I	APC4223	-26.9868	-25.4868	195	-3.5	unpub.
58	Füzesabony-Gubakút	FUG4307	-26.7868	-25.2868	70	-5.38	unpub.
58	Füzesabony-Gubakút	FUG4294	-27.2668	-25.7668	66	-5.35	unpub.
58	Füzesabony-Gubakút	FUG4343	-27.1368	-25.6368	20	-4.92	unpub.
58	Füzesabony-Gubakút	FUG4290	-26.55	-25.05	\N	-4.81	unpub.
58	Füzesabony-Gubakút	FUGC1120	-27.7968	-26.2968	329	-3.62	unpub.
58	Füzesabony-Gubakút	FUG4313	-28.93	-27.43	23	-3.62	unpub.
58	Füzesabony-Gubakút	FUG4322	-27.2068	-25.7068	103	-3.17	unpub.
59	Polgár-Ferenci-hát	PFH4996	-25.5668	-24.0668	113	-5.62	unpub.
59	Polgár-Ferenci-hát	PFH4978	-26.4568	-24.9568	36.2	-4.98	unpub.
59	Polgár-Ferenci-hát	PFH4974	-26.4168	-24.9168	19.7	-4.37	unpub.
60	Felsővadász-Várdomb	FSV5081	-24.8468	-23.3468	76	-4.31	unpub.
60	Felsővadász-Várdomb	FSV5074	-24.1168	-22.6168	389	-3.11	unpub.
61	Garadna- Elkerülő út	GRD5037	-25.7868	-24.2868	68	-4.78	unpub.
61	Garadna- Elkerülő út	GRD5044	-26.0768	-24.5768	17	-4.44	unpub.
61	Garadna- Elkerülő út	GRD5026	-25.5768	-24.0768	141	-4.1	unpub.
61	Garadna- Elkerülő út	GRD5013	-27.2968	-25.7968	65	-4.09	unpub.

## Sheet: SI_Table 3_BT Collagen_δ13C
Site number	Site name	Species	δ13C coll(‰)	δ13Cdiet (‰)	Reference
1	Cuiry-lès-Chaudardes	Bos taurus	-23	-28.1	Balasse unpub. PhD thesis 1999
1	Cuiry-lès-Chaudardes	Bos taurus	-23.4	-28.5	Balasse unpub. PhD thesis 1999
1	Cuiry-lès-Chaudardes	Bos taurus	-22.2	-27.3	Balasse unpub. PhD thesis 1999
1	Cuiry-lès-Chaudardes	Bos taurus	-23.5	-28.6	Balasse unpub. PhD thesis 1999
1	Cuiry-lès-Chaudardes	Bos taurus	-22.5	-27.6	Balasse unpub. PhD thesis 1999
1	Cuiry-lès-Chaudardes	Bos taurus	-23.2	-28.3	Balasse unpub. PhD thesis 1999
1	Cuiry-lès-Chaudardes	Bos taurus	-23.5	-28.6	Balasse unpub. PhD thesis 1999
1	Cuiry-lès-Chaudardes	Bos taurus	-22.8	-27.9	Balasse unpub. PhD thesis 1999
8	Ensisheim-Ratfeld	Bos taurus	-21	-26.1	Bickle et al. 2013c
8	Ensisheim-Ratfeld	Bos taurus	-22.4	-27.5	Bickle et al. 2013c
8	Ensisheim-Ratfeld	Bos taurus	-21.4	-26.5	Bickle et al. 2013c
8	Ensisheim-Ratfeld	Bos taurus	-20.5	-25.6	Bickle et al. 2013c
8	Ensisheim-Ratfeld	Bos taurus	-23.3	-28.4	Bickle et al. 2013c
8	Ensisheim-Ratfeld	Bos taurus	-20.3	-25.4	Bickle et al. 2013c
8	Ensisheim-Ratfeld	Bos taurus	-21.6	-26.7	Bickle et al. 2013c
8	Ensisheim-Ratfeld	Bos taurus	-21.9	-27	Bickle et al. 2013c
8	Ensisheim-Ratfeld	Bos taurus	-22	-27.1	Bickle et al. 2013c
8	Ensisheim-Ratfeld	Bos taurus	-21.3	-26.4	Bickle et al. 2013c
8	Ensisheim-Ratfeld	Bos taurus	-22.1	-27.2	Bickle et al. 2013c
8	Ensisheim-Ratfeld	Bos taurus	-20.7	-25.8	Bickle et al. 2013c
8	Ensisheim-Ratfeld	Bos taurus	-23.7	-28.8	Bickle et al. 2013c
8	Ensisheim-Ratfeld	Bos taurus	-21.3	-26.4	Bickle et al. 2013c
11	Bischoffsheim	Bos taurus	-23.1	-28.2	Bickle et al. 2013c
11	Bischoffsheim	Bos taurus	-21.2	-26.3	Bickle et al. 2013c
11	Bischoffsheim	Bos taurus	-23.4	-28.5	Bickle et al. 2013c
11	Bischoffsheim	Bos taurus	-22.2	-27.3	Bickle et al. 2013c
11	Bischoffsheim	Bos taurus	-23.8	-28.9	Bickle et al. 2013c
11	Bischoffsheim	Bos taurus	-23.9	-29	Bickle et al. 2013c
11	Bischoffsheim	Bos taurus	-23.2	-28.3	Bickle et al. 2013c
11	Bischoffsheim	Bos taurus	-23.6	-28.7	Bickle et al. 2013c
11	Bischoffsheim	Bos taurus	-21	-26.1	Bickle et al. 2013c
11	Bischoffsheim	Bos taurus	-22.4	-27.5	Bickle et al. 2013c
11	Bischoffsheim	Bos taurus	-23.7	-28.8	Bickle et al. 2013c
11	Bischoffsheim	Bos taurus	-24	-29.1	Bickle et al. 2013c
11	Bischoffsheim	Bos taurus	-23.51	-28.61	Bickle et al. 2013c
11	Bischoffsheim	Bos taurus	-22.1	-27.2	Bickle et al. 2013c
11	Bischoffsheim	Bos taurus	-23.5	-28.6	unpub. Gillis et al. Submitted
11	Bischoffsheim	Bos taurus	-23.181	-28.281	unpub. Gillis et al. Submitted
11	Bischoffsheim	Bos taurus	-22.299	-27.399	unpub. Gillis et al. Submitted
11	Bischoffsheim	Bos taurus	-21.975	-27.075	unpub. Gillis et al. Submitted
12	Herxheim	Bos taurus	-21.2	-26.3	Durrwachter et al. 2005
14	Vaihingen an der Enz	Bos taurus	-22.9	-28	Fraser et al. 2013
14	Vaihingen an der Enz	Bos taurus	-21.8	-26.9	Fraser et al. 2013
14	Vaihingen an der Enz	Bos taurus	-22.3	-27.4	Fraser et al. 2013
14	Vaihingen an der Enz	Bos taurus	-21	-26.1	Fraser et al. 2013
14	Vaihingen an der Enz	Bos taurus	-22.9	-28	Fraser et al. 2013
14	Vaihingen an der Enz	Bos taurus	-23.6	-28.7	Fraser et al. 2013
14	Vaihingen an der Enz	Bos taurus	-22.4	-27.5	Fraser et al. 2013
14	Vaihingen an der Enz	Bos taurus	-21.9	-27	Fraser et al. 2013
14	Vaihingen an der Enz	Bos taurus	-23.7	-28.8	Fraser et al. 2013
14	Vaihingen an der Enz	Bos taurus	-22.7	-27.8	Fraser et al. 2013
14	Vaihingen an der Enz	Bos taurus	-23.1	-28.2	Fraser et al. 2013
14	Vaihingen an der Enz	Bos taurus	-21.8	-26.9	Fraser et al. 2013
14	Vaihingen an der Enz	Bos taurus	-22.6	-27.7	Fraser et al. 2013
14	Vaihingen an der Enz	Bos taurus	-22.7	-27.8	Fraser et al. 2013
14	Vaihingen an der Enz	Bos taurus	-23.1	-28.2	Fraser et al. 2013
14	Vaihingen an der Enz	Bos taurus	-23.4	-28.5	Fraser et al. 2013
14	Vaihingen an der Enz	Bos taurus	-23	-28.1	Fraser et al. 2013
14	Vaihingen an der Enz	Bos taurus	-23.2	-28.3	Fraser et al. 2013
14	Vaihingen an der Enz	Bos taurus	-22.6	-27.7	Fraser et al. 2013
14	Vaihingen an der Enz	Bos taurus	-22.3	-27.4	Fraser et al. 2013
14	Vaihingen an der Enz	Bos taurus	-23.1	-28.2	Fraser et al. 2013
14	Vaihingen an der Enz	Bos taurus	-22.5	-27.6	Fraser et al. 2013
14	Vaihingen an der Enz	Bos taurus	-22.7	-27.8	Fraser et al. 2013
14	Vaihingen an der Enz	Bos taurus	-23	-28.1	Fraser et al. 2013
14	Vaihingen an der Enz	Bos taurus	-22.4	-27.5	Fraser et al. 2013
15	Heilbron-Neckargartach	Bos taurus	-22	-27.1	Bentley et al. 2013
15	Heilbron-Neckargartach	Bos taurus	-23.5	-28.6	Bentley et al. 2013
15	Heilbron-Neckargartach	Bos taurus	-21.5	-26.6	Bentley et al. 2013
15	Heilbron-Neckargartach	Bos taurus	-20.4	-25.5	Bentley et al. 2013
15	Heilbron-Neckargartach	Bos taurus	-21.8	-26.9	Bentley et al. 2013
15	Heilbron-Neckargartach	Bos taurus	-21.4	-26.5	Bentley et al. 2013
15	Heilbron-Neckargartach	Bos taurus	-20.5	-25.6	Bentley et al. 2013
15	Heilbron-Neckargartach	Bos taurus	-19.9	-25	Bentley et al. 2013
17	Derenburg Meerenstieg II	Bos taurus	-20.2	-25.3	Oelze et al. 2012
17	Derenburg Meerenstieg II	Bos taurus	-20.1	-25.2	Oelze et al. 2012
17	Derenburg Meerenstieg II	Bos taurus	-19.6	-24.7	Oelze et al. 2012
17	Derenburg Meerenstieg II	Bos taurus	-20.2	-25.3	Oelze et al. 2012
17	Derenburg Meerenstieg II	Bos taurus	-21.4	-26.5	Oelze et al. 2012
18	Halberstadt Sonntagsfeld	Bos taurus	-20.5	-25.6	Oelze et al. 2012
18	Halberstadt Sonntagsfeld	Bos taurus	-21.6	-26.7	Oelze et al. 2012
18	Halberstadt Sonntagsfeld	Bos taurus	-21.1	-26.2	Oelze et al. 2012
19	Karsdorf	Bos taurus	-20.8	-25.9	Oelze et al. 2012
19	Karsdorf	Bos taurus	-20.4	-25.5	Oelze et al. 2012
19	Karsdorf	Bos taurus	-20.4	-25.5	Oelze et al. 2012
19	Karsdorf	Bos taurus	-21.6	-26.7	Oelze et al. 2012
19	Karsdorf	Bos taurus	-22.5	-27.6	Oelze et al. 2012
19	Karsdorf	Bos taurus	-20.7	-25.8	Oelze et al. 2012
19	Karsdorf	Bos taurus	-21.1	-26.2	Oelze et al. 2012
19	Karsdorf	Bos taurus	-21.7	-26.8	Oelze et al. 2012
19	Karsdorf	Bos taurus	-21.7	-26.8	Oelze et al. 2012
19	Karsdorf	Bos taurus	-22.2	-27.3	Oelze et al. 2012
19	Karsdorf	Bos taurus	-23.2	-28.3	Oelze et al. 2012
19	Karsdorf	Bos taurus	-20.6	-25.7	Oelze et al. 2012
19	Karsdorf	Bos taurus	-21.3	-26.4	Oelze et al. 2012
19	Karsdorf	Bos taurus	-21.8	-26.9	Oelze et al. 2012
19	Karsdorf	Bos taurus	-21	-26.1	Oelze et al. 2012
22	Aiterhofen	Bos taurus	-19.8	-24.9	Hoffman et al. 2013
22	Aiterhofen	Bos taurus	-21.6	-26.7	Hoffman et al. 2013
22	Aiterhofen	Bos taurus	-21.4	-26.5	Hoffman et al. 2013
22	Aiterhofen	Bos taurus	-20.9	-26	Hoffman et al. 2013
22	Aiterhofen	Bos taurus	-20.7	-25.8	Hoffman et al. 2013
23	Lerchenhaid	Bos taurus	-21.1	-26.2	Hoffman et al. 2013
23	Lerchenhaid	Bos taurus	-21.3	-26.4	Hoffman et al. 2013
23	Lerchenhaid	Bos taurus	-22.1	-27.2	Hoffman et al. 2013
23	Lerchenhaid	Bos taurus	-22.3	-27.4	Hoffman et al. 2013
23	Lerchenhaid	Bos taurus	-23.1	-28.2	Hoffman et al. 2013
23	Lerchenhaid	Bos taurus	-20.3	-25.4	Hoffman et al. 2013
23	Lerchenhaid	Bos taurus	-20.7	-25.8	Hoffman et al. 2013
23	Lerchenhaid	Bos taurus	-21.2	-26.3	Hoffman et al. 2013
23	Lerchenhaid	Bos taurus	-20.1	-25.2	Hoffman et al. 2013
23	Lerchenhaid	Bos taurus	-22	-27.1	Hoffman et al. 2013
23	Lerchenhaid	Bos taurus	-20.9	-26	Hoffman et al. 2013
23	Lerchenhaid	Bos taurus	-20.3	-25.4	Hoffman et al. 2013
23	Lerchenhaid	Bos taurus	-21.1	-26.2	Hoffman et al. 2013
23	Lerchenhaid	Bos taurus	-21.1	-26.2	Hoffman et al. 2013
23	Lerchenhaid	Bos taurus	-21	-26.1	Hoffman et al. 2013
23	Lerchenhaid	Bos taurus	-20.7	-25.8	Hoffman et al. 2013
23	Lerchenhaid	Bos taurus	-20.2	-25.3	Hoffman et al. 2013
25	Rutzing/Haid	Bos taurus	-21.4	-26.5	Bickle et al. 2013a
25	Rutzing/Haid	Bos taurus	-21.2	-26.3	Bickle et al. 2013a
25	Rutzing/Haid	Bos taurus	-21.4	-26.5	Bickle et al. 2013a
25	Rutzing/Haid	Bos taurus	-21.6	-26.7	Bickle et al. 2013a
25	Rutzing/Haid	Bos taurus	-22.7	-27.8	Bickle et al. 2013a
25	Rutzing/Haid	Bos taurus	-21.7	-26.8	Bickle et al. 2013a
25	Rutzing/Haid	Bos taurus	-21	-26.1	Bickle et al. 2013a
25	Rutzing/Haid	Bos taurus	-21.2	-26.3	Bickle et al. 2013a
25	Rutzing/Haid	Bos taurus	-23.9	-29	Bickle et al. 2013a
25	Rutzing/Haid	Bos taurus	-23.1	-28.2	Bickle et al. 2013a
25	Rutzing/Haid	Bos taurus	-20.9	-26	Bickle et al. 2013a
31	Černý Vůl	Bos taurus	-20.1	-25.6	Berthon et al. 2017
31	Černý Vůl	Bos taurus	-21	-25.3	Berthon et al. 2017
31	Černý Vůl	Bos taurus	-20.5	-25.8	Berthon et al. 2017
31	Černý Vůl	Bos taurus	-20.9	-25.2	Berthon et al. 2017
31	Černý Vůl	Bos taurus	-20.4	-25.2	Berthon et al. 2017
33	Chotěbudice	Bos taurus	-20.8	-25.9	Berthon et al. 2017
33	Chotěbudice	Bos taurus	-21.3	-26.4	Berthon et al. 2017
33	Chotěbudice	Bos taurus	-19.5	-24.6	Berthon et al. 2017
33	Chotěbudice	Bos taurus	-20.6	-25.7	Berthon et al. 2017
33	Chotěbudice	Bos taurus	-20.1	-25.2	Berthon et al. 2017
33	Chotěbudice	Bos taurus	-20.5	-25.6	Berthon et al. 2017
33	Chotěbudice	Bos taurus	-20.3	-25.4	Berthon et al. 2017
33	Chotěbudice	Bos taurus	-20.9	-26	Berthon et al. 2017
33	Chotěbudice	Bos taurus	-20.1	-25.2	Berthon et al. 2017
33	Chotěbudice	Bos taurus	-20.6	-25.7	Berthon et al. 2017
33	Chotěbudice	Bos taurus	-20.7	-25.8	Berthon et al. 2017
33	Chotěbudice	Bos taurus	-20.1	-25.2	Berthon et al. 2017
33	Chotěbudice	Bos taurus	-20.2	-25.3	Berthon et al. 2017
33	Chotěbudice	Bos taurus	-20	-25.1	Berthon et al. 2017
33	Chotěbudice	Bos taurus	-19.8	-24.9	Berthon et al. 2017
35	Těšetice-Kyjovice	Bos taurus	-20.2	-25.3	Whittle et al. 2013b
35	Těšetice-Kyjovice	Bos taurus	-20.3	-25.4	Whittle et al. 2013b
35	Těšetice-Kyjovice	Bos taurus	-20.2	-25.3	Whittle et al. 2013b
35	Těšetice-Kyjovice	Bos taurus	-20.1	-25.2	Whittle et al. 2013b
35	Těšetice-Kyjovice	Bos taurus	-20.2	-25.3	Whittle et al. 2013b
35	Těšetice-Kyjovice	Bos taurus	-20.3	-25.4	Whittle et al. 2013b
35	Těšetice-Kyjovice	Bos taurus	-19.9	-25	Whittle et al. 2013b
37	Gnadendorf	Bos taurus	-20.5	-25.6	Bickle et al. 2013b
37	Gnadendorf	Bos taurus	-20.2	-25.3	Bickle et al. 2013b
37	Gnadendorf	Bos taurus	-20.7	-25.8	Bickle et al. 2013b
37	Gnadendorf	Bos taurus	-20.1	-25.2	Bickle et al. 2013b
37	Gnadendorf	Bos taurus	-20.1	-25.2	Bickle et al. 2013b
37	Gnadendorf	Bos taurus	-20.9	-26	Bickle et al. 2013b
38	Vedrovice-Sídliště	Bos taurus	-19.8	-24.9	Whittle et al. 2013b
38	Vedrovice-Sídliště	Bos taurus	-20.3	-25.4	Whittle et al. 2013b
38	Vedrovice-Sídliště	Bos taurus	-20.3	-25.4	Whittle et al. 2013b
39	Asparn a.d. Zaya/Schletz	Bos taurus	-19.8	-24.9	Bickle et al. 2013b
40	Blatné	Bos taurus	-21	-26.1	Bickle et al. 2013b
40	Blatné	Bos taurus	-20.6	-25.7	Bickle et al. 2013b
40	Blatné	Bos taurus	-20.6	-25.7	Bickle et al. 2013b
40	Blatné	Bos taurus	-21.5	-26.6	Bickle et al. 2013b
40	Blatné	Bos taurus	-20.5	-25.6	Bickle et al. 2013b
40	Blatné	Bos taurus	-20.2	-25.3	Bickle et al. 2013b
40	Blatné	Bos taurus	-20.6	-25.7	Bickle et al. 2013b
40	Blatné	Bos taurus	-20.7	-25.8	Bickle et al. 2013b
40	Blatné	Bos taurus	-20	-25.1	Bickle et al. 2013b
40	Blatné	Bos taurus	-20.6	-25.7	Bickle et al. 2013b
40	Blatné	Bos taurus	-21.2	-26.3	Bickle et al. 2013b
48	Kopydłowo 6	Bos taurus	-20.8	-25.9	Marcinak et al. 2017
48	Kopydłowo 6	Bos taurus	-20.4	-25.5	Marcinak et al. 2017
48	Kopydłowo 6	Bos taurus	-19.9	-25	Marcinak et al. 2017
48	Kopydłowo 6	Bos taurus	-20.1	-25.2	Marcinak et al. 2017
48	Kopydłowo 6	Bos taurus	-20.2	-25.3	Marcinak et al. 2017
48	Kopydłowo 6	Bos taurus	-20.7	-25.8	Marcinak et al. 2017
48	Kopydłowo 6	Bos taurus	-21	-26.1	Marcinak et al. 2017
48	Kopydłowo 6	Bos taurus	-20.2	-25.3	Marcinak et al. 2017
48	Kopydłowo 6	Bos taurus	-20.8	-25.9	Marcinak et al. 2017
53	Vrable-Veľké Lehemby	Bos taurus	-20.0851	-25.1851	Gillis et al. 2020
53	Vrable-Veľké Lehemby	Bos taurus	-19.9427	-25.0427	Gillis et al. 2020
53	Vrable-Veľké Lehemby	Bos taurus	-18.9252	-24.0252	Gillis et al. 2020
53	Vrable-Veľké Lehemby	Bos taurus	-20.262	-25.362	Gillis et al. 2020
53	Vrable-Veľké Lehemby	Bos taurus	-20.0927	-25.1927	Gillis et al. 2020
53	Vrable-Veľké Lehemby	Bos taurus	-20.477	-25.577	Gillis et al. 2020
53	Vrable-Veľké Lehemby	Bos taurus	-20.459	-25.559	Gillis et al. 2020
53	Vrable-Veľké Lehemby	Bos taurus	-20.2339	-25.3339	Gillis et al. 2020
53	Vrable-Veľké Lehemby	Bos taurus	-20.2935	-25.3935	Gillis et al. 2020
53	Vrable-Veľké Lehemby	Bos taurus	-19.6854	-24.7854	Gillis et al. 2020
53	Vrable-Veľké Lehemby	Bos taurus	-19.6107	-24.7107	Gillis et al. 2020
53	Vrable-Veľké Lehemby	Bos taurus	-19.7057	-24.8057	Gillis et al. 2020
53	Vrable-Veľké Lehemby	Bos taurus	-20.1325	-25.2325	Gillis et al. 2020
53	Vrable-Veľké Lehemby	Bos taurus	-19.9974	-25.0974	Gillis et al. 2020
53	Vrable-Veľké Lehemby	Bos taurus	-20.6918	-25.7918	Gillis et al. 2020
53	Vrable-Veľké Lehemby	Bos taurus	-20.5202	-25.6202	Gillis et al. 2020
53	Vrable-Veľké Lehemby	Bos taurus	-19.9859	-25.0859	Gillis et al. 2020
53	Vrable-Veľké Lehemby	Bos taurus	-20.6804	-25.7804	Gillis et al. 2020
54	Balatonszárszó-Kis-erdei-dűlő	Bos taurus	-19.7	-24.8	Whittle et al. 2013a
54	Balatonszárszó-Kis-erdei-dűlő	Bos taurus	-20.6	-25.7	Whittle et al. 2013a
54	Balatonszárszó-Kis-erdei-dűlő	Bos taurus	-20.1	-25.2	Whittle et al. 2013a
54	Balatonszárszó-Kis-erdei-dűlő	Bos taurus	-19.6	-24.7	Whittle et al. 2013a
54	Balatonszárszó-Kis-erdei-dűlő	Bos taurus	-19.7	-24.8	Whittle et al. 2013a
54	Balatonszárszó-Kis-erdei-dűlő	Bos taurus	-21	-26.1	Whittle et al. 2013a
54	Balatonszárszó-Kis-erdei-dűlő	Bos taurus	-21	-26.1	Whittle et al. 2013a
54	Balatonszárszó-Kis-erdei-dűlő	Bos taurus	-18.9	-24	Whittle et al. 2013a
54	Balatonszárszó-Kis-erdei-dűlő	Bos taurus	-20.4	-25.5	Whittle et al. 2013a
54	Balatonszárszó-Kis-erdei-dűlő	Bos taurus	-19.1	-24.2	Whittle et al. 2013a
54	Balatonszárszó-Kis-erdei-dűlő	Bos taurus	-19.7	-24.8	Whittle et al. 2013a
54	Balatonszárszó-Kis-erdei-dűlő	Bos taurus	-20.4	-25.5	Whittle et al. 2013a
54	Balatonszárszó-Kis-erdei-dűlő	Bos taurus	-19.9	-25	Whittle et al. 2013a
54	Balatonszárszó-Kis-erdei-dűlő	Bos taurus	-18.8	-23.9	Whittle et al. 2013a
54	Balatonszárszó-Kis-erdei-dűlő	Bos taurus	-19.5	-24.6	Whittle et al. 2013a
54	Balatonszárszó-Kis-erdei-dűlő	Bos taurus	-19.9	-25	Whittle et al. 2013a
54	Balatonszárszó-Kis-erdei-dűlő	Bos taurus	-18.5	-23.6	Whittle et al. 2013a
54	Balatonszárszó-Kis-erdei-dűlő	Bos taurus	-19.7	-24.8	Whittle et al. 2013a
54	Balatonszárszó-Kis-erdei-dűlő	Bos taurus	-19.5	-24.6	Whittle et al. 2013a
54	Balatonszárszó-Kis-erdei-dűlő	Bos taurus	-19.8	-24.9	Whittle et al. 2013a
54	Balatonszárszó-Kis-erdei-dűlő	Bos taurus	-21.6	-26.7	Whittle et al. 2013a
54	Balatonszárszó-Kis-erdei-dűlő	Bos taurus	-19.1	-24.2	Whittle et al. 2013a
54	Balatonszárszó-Kis-erdei-dűlő	Bos taurus	-19.7	-24.8	Whittle et al. 2013a
54	Balatonszárszó-Kis-erdei-dűlő	Bos taurus	-19.3	-24.4	Whittle et al. 2013a
54	Balatonszárszó-Kis-erdei-dűlő	Bos taurus	-20.7	-25.8	Whittle et al. 2013a
54	Balatonszárszó-Kis-erdei-dűlő	Bos taurus	-19.4	-24.5	Whittle et al. 2013a
54	Balatonszárszó-Kis-erdei-dűlő	Bos taurus	-20.4	-25.5	Whittle et al. 2013a
54	Balatonszárszó-Kis-erdei-dűlő	Bos taurus	-18.4	-23.5	Whittle et al. 2013a
54	Balatonszárszó-Kis-erdei-dűlő	Bos taurus	-18.9	-24	Whittle et al. 2013a
54	Balatonszárszó-Kis-erdei-dűlő	Bos taurus	-20.4	-25.5	Whittle et al. 2013a
54	Balatonszárszó-Kis-erdei-dűlő	Bos taurus	-20.9	-26	Whittle et al. 2013a
54	Balatonszárszó-Kis-erdei-dűlő	Bos taurus	-17	-22.1	Whittle et al. 2013a
54	Balatonszárszó-Kis-erdei-dűlő	Bos taurus	-20	-25.1	Whittle et al. 2013a
54	Balatonszárszó-Kis-erdei-dűlő	Bos taurus	-19.6	-24.7	Whittle et al. 2013a
54	Balatonszárszó-Kis-erdei-dűlő	Bos taurus	-19	-24.1	Whittle et al. 2013a
54	Balatonszárszó-Kis-erdei-dűlő	Bos taurus	-20.4	-25.5	Whittle et al. 2013a
54	Balatonszárszó-Kis-erdei-dűlő	Bos taurus	-21.4	-26.5	Whittle et al. 2013a
54	Balatonszárszó-Kis-erdei-dűlő	Bos taurus	-20.2	-25.3	Whittle et al. 2013a
54	Balatonszárszó-Kis-erdei-dűlő	Bos taurus	-18.4	-23.5	Whittle et al. 2013a
54	Balatonszárszó-Kis-erdei-dűlő	Bos taurus	-19.9	-25	Whittle et al. 2013a
54	Balatonszárszó-Kis-erdei-dűlő	Bos taurus	-21.6	-26.7	Whittle et al. 2013a
54	Balatonszárszó-Kis-erdei-dűlő	Bos taurus	-18.6	-23.7	Whittle et al. 2013a
54	Balatonszárszó-Kis-erdei-dűlő	Bos taurus	-19.5	-24.6	Whittle et al. 2013a
54	Balatonszárszó-Kis-erdei-dűlő	Bos taurus	-20.4	-25.5	Whittle et al. 2013a
54	Balatonszárszó-Kis-erdei-dűlő	Bos taurus	-19.7	-24.8	Whittle et al. 2013a
54	Balatonszárszó-Kis-erdei-dűlő	Bos taurus	-19.5	-24.6	Whittle et al. 2013a
54	Balatonszárszó-Kis-erdei-dűlő	Bos taurus	-20.11	-25.21	Whittle et al. 2013a
54	Balatonszárszó-Kis-erdei-dűlő	Bos taurus	-19.7	-24.8	Whittle et al. 2013a
54	Balatonszárszó-Kis-erdei-dűlő	Bos taurus	-17.5	-22.6	Whittle et al. 2013a
54	Balatonszárszó-Kis-erdei-dűlő	Bos taurus	-20.4	-25.5	Whittle et al. 2013a
54	Balatonszárszó-Kis-erdei-dűlő	Bos taurus	-20.2	-25.3	Whittle et al. 2013a
54	Balatonszárszó-Kis-erdei-dűlő	Bos taurus	-21.2	-26.3	Whittle et al. 2013a
54	Balatonszárszó-Kis-erdei-dűlő	Bos taurus	-19.9	-25	Whittle et al. 2013a
54	Balatonszárszó-Kis-erdei-dűlő	Bos taurus	-21.5	-26.6	Whittle et al. 2013a
54	Balatonszárszó-Kis-erdei-dűlő	Bos taurus	-21.1	-26.2	Whittle et al. 2013a
54	Balatonszárszó-Kis-erdei-dűlő	Bos taurus	-20.8	-25.9	Whittle et al. 2013a
54	Balatonszárszó-Kis-erdei-dűlő	Bos taurus	-19.7	-24.8	Whittle et al. 2013a
54	Balatonszárszó-Kis-erdei-dűlő	Bos taurus	-20.4	-25.5	Whittle et al. 2013a
54	Balatonszárszó-Kis-erdei-dűlő	Bos taurus	-20	-25.1	Whittle et al. 2013a
54	Balatonszárszó-Kis-erdei-dűlő	Bos taurus	-20.8	-25.9	Whittle et al. 2013a
58	Füzesabony-Gubakút	Bos taurus	-19.6	-24.7	Whittle et al. 2013
58	Füzesabony-Gubakút	Bos taurus	-19.9	-25	Whittle et al. 2013
58	Füzesabony-Gubakút	Bos taurus	-21.21	-26.31	Whittle et al. 2013
58	Füzesabony-Gubakút	Bos taurus	-20.6	-25.7	Whittle et al. 2013
58	Füzesabony-Gubakút	Bos taurus	-20	-25.1	Whittle et al. 2013
58	Füzesabony-Gubakút	Bos taurus	-20.3	-25.4	Whittle et al. 2013
58	Füzesabony-Gubakút	Bos taurus	-20.7	-25.8	Whittle et al. 2013
58	Füzesabony-Gubakút	Bos taurus	-20.6	-25.7	Whittle et al. 2013
58	Füzesabony-Gubakút	Bos taurus	-20.9	-26	Whittle et al. 2013
58	Füzesabony-Gubakút	Bos taurus	-20.2	-25.3	Whittle et al. 2013
58	Füzesabony-Gubakút	Bos taurus	-19.3	-24.4	Whittle et al. 2013
58	Füzesabony-Gubakút	Bos taurus	-20.7	-25.8	Whittle et al. 2013
58	Füzesabony-Gubakút	Bos taurus	-20.2	-25.3	Whittle et al. 2013
58	Füzesabony-Gubakút	Bos taurus	-20.2	-25.3	Whittle et al. 2013
59	Polgár-Ferenci-hát	Bos taurus	-20	-25.1	Whittle et al. 2013
59	Polgár-Ferenci-hát	Bos taurus	-21	-26.1	Whittle et al. 2013
59	Polgár-Ferenci-hát	Bos taurus	-19.3	-24.4	Whittle et al. 2013
59	Polgár-Ferenci-hát	Bos taurus	-19.8	-24.9	Whittle et al. 2013
59	Polgár-Ferenci-hát	Bos taurus	-19.7	-24.8	Whittle et al. 2013
59	Polgár-Ferenci-hát	Bos taurus	-19.4	-24.5	Whittle et al. 2013
59	Polgár-Ferenci-hát	Bos taurus	-19.4	-24.5	Whittle et al. 2013
59	Polgár-Ferenci-hát	Bos taurus	-20.2	-25.3	Whittle et al. 2013
59	Polgár-Ferenci-hát	Bos taurus	-19.4	-24.5	Whittle et al. 2013
59	Polgár-Ferenci-hát	Bos taurus	-20	-25.1	Whittle et al. 2013
59	Polgár-Ferenci-hát	Bos taurus	-20.3	-25.4	Whittle et al. 2013
59	Polgár-Ferenci-hát	Bos taurus	-18.8	-23.9	Whittle et al. 2013
59	Polgár-Ferenci-hát	Bos taurus	-19.4	-24.5	Whittle et al. 2013

## Sheet: SI_Table 4_Bioap_δ13C
Site No.	Site	Sample tooth ID	N	δ13Cbioap Mdpt (‰)	δ13Cbioap low (‰)	δ13Cbioap high (‰)	Ampitude	δ13Cdiet Mdpt (‰)	δ13Cdiet low (‰)	δ13Cdiet high (‰)	Reference
11	Bischoffsheim	BIS1	19	-14.8995	-15.46	-14.339	1.121	-29.4995	-30.06	-28.939	unpub. Gillis et al. Submitted
11	Bischoffsheim	BIS2	20	-13.3	-13.636	-12.964	0.672	-27.9	-28.236	-27.564	unpub. Gillis et al. Submitted
11	Bischoffsheim	BIS3	20	-13.965	-14.742	-13.188	1.554	-28.565	-29.342	-27.788	unpub. Gillis et al. Submitted
11	Bischoffsheim	BIS4	20	-13.9475	-14.765	-13.13	1.635	-28.5475	-29.365	-27.73	unpub. Gillis et al. Submitted
11	Bischoffsheim	BIS5	20	-13.843	-14.645	-13.041	1.604	-28.443	-29.245	-27.641	unpub. Gillis et al. Submitted
11	Bischoffsheim	BIS6	18	-13.2125	-14.181	-12.244	1.937	-27.8125	-28.781	-26.844	unpub. Gillis et al. Submitted
11	Bischoffsheim	BIS7	16	-13.855	-15.146	-12.564	2.582	-28.455	-29.746	-27.164	unpub. Gillis et al. Submitted
31	Černý Vůl	CerV1_prot	20	-11.4	-11.8	-11	0.8	-26	-26.4	-25.6	Berthon et al. 2017
31	Černý Vůl	CerV2_prot	20	-11.4	-11.7	-11.1	0.6	-26	-26.3	-25.7	Berthon et al. 2017
31	Černý Vůl	CerV3_hypo	28	-11.75	-12.3	-11.2	1.1	-26.35	-26.9	-25.8	Berthon et al. 2017
31	Černý Vůl	CerV4_hypo	20	-11.75	-12.3	-11.2	1.1	-26.35	-26.9	-25.8	Berthon et al. 2017
33	Chotěbudice	CHO1_hypo	15	-10.8	-11.5	-10.1	1.4	-25.4	-26.1	-24.7	Kovačiková et al. 2012
33	Chotěbudice	CHO2_hypo	16	-11.1	-11.6	-10.6	1	-25.7	-26.2	-25.2	Kovačiková et al. 2012
33	Chotěbudice	CHO3_hypo	17	-10.8	-11	-10.6	0.4	-25.4	-25.6	-25.2	Kovačiková et al. 2012
33	Chotěbudice	CHO4_hypo	22	-11.05	-11.4	-10.7	0.7	-25.65	-26	-25.3	Kovačiková et al. 2012
33	Chotěbudice	CHO5_hypo	23	-11.35	-11.8	-10.9	0.9	-25.95	-26.4	-25.5	Kovačiková et al. 2012
33	Chotěbudice	CHO6_hypo	20	-11.05	-11.4	-10.4	1	-25.65	-26	-25	Berthon et al. 2017
33	Chotěbudice	CHO7_hypo	26	-12.1	-12.6	-11.6	1	-26.7	-27.2	-26.2	Berthon et al. 2017
33	Chotěbudice	CHO8_hypo	22	-10.2	-10.6	-9.8	0.8	-24.8	-25.2	-24.4	Berthon et al. 2017
33	Chotěbudice	CHO9_hypo	29	-12.4	-13.6	-11.2	2.4	-27	-28.2	-25.8	Berthon et al. 2017
33	Chotěbudice	CHO10_hypo	30	-10.6	-11	-10.2	0.8	-25.2	-25.6	-24.8	Berthon et al. 2017
35	Těšetice-Kyjovice	TES1	12	-12.2525	-12.739	-11.766	0.973	-26.8525	-27.339	-26.366	unpub.
35	Těšetice-Kyjovice	TES2	20	-11.705	-12.692	-10.718	1.974	-26.305	-27.292	-25.318	unpub.
49	Ludwinowo 7	LUD1	13	-10.714	-10.953	-10.475	0.478	-25.314	-25.553	-25.075	Kendall et al. 2019
49	Ludwinowo 7	LUD2	20	-11.6325	-12.097	-11.168	0.929	-26.2325	-26.697	-25.768	Kendall et al. 2019
49	Ludwinowo 7	LUD3	20	-11.3105	-11.838	-10.783	1.055	-25.9105	-26.438	-25.383	Kendall et al. 2019
49	Ludwinowo 7	LUD4	19	-11.768	-12.02	-11.516	0.504	-26.368	-26.62	-26.116	Kendall et al. 2019
49	Ludwinowo 7	LUD5	20	-11.482	-11.862	-11.102	0.76	-26.082	-26.462	-25.702	Kendall et al. 2019
49	Ludwinowo 7	LUD6	19	-11.669	-11.979	-11.359	0.62	-26.269	-26.579	-25.959	Kendall et al. 2019
49	Ludwinowo 7	LUD7	19	-10.5235	-11.378	-9.669	1.709	-25.1235	-25.978	-24.269	Kendall et al. 2019
49	Ludwinowo 7	LUD8	20	-10.9415	-11.496	-10.387	1.109	-25.5415	-26.096	-24.987	Kendall et al. 2019
49	Ludwinowo 7	LUD9	20	-11.4355	-11.588	-11.283	0.305	-26.0355	-26.188	-25.883	Kendall et al. 2019
49	Ludwinowo 7	LUD10	20	-10.93	-11.208	-10.652	0.556	-25.53	-25.808	-25.252	Kendall et al. 2019
54	Balatonszárszó-Kis-erdei-dűlő	BAL1	16	-10.7265	-11.556	-9.897	1.659	-25.3265	-26.156	-24.497	unpub.
54	Balatonszárszó-Kis-erdei-dűlő	BAL2	15	-10.0145	-11.74	-8.289	3.451	-24.6145	-26.34	-22.889	unpub.
54	Balatonszárszó-Kis-erdei-dűlő	BAL3	18	-10.668	-11.447	-9.889	1.558	-25.268	-26.047	-24.489	unpub.
54	Balatonszárszó-Kis-erdei-dűlő	BAL4	15	-11.075	-11.724	-10.426	1.298	-25.675	-26.324	-25.026	unpub.
54	Balatonszárszó-Kis-erdei-dűlő	BAL5	15	-11.0605	-12.108	-10.013	2.095	-25.6605	-26.708	-24.613	unpub.
57	Apc-Berekalja I	APC1	20	-11.392	-12.023	-10.761	1.262	-25.992	-26.623	-25.361	unpub.
57	Apc-Berekalja I	APC2	18	-13.2405	-13.849	-12.632	1.217	-27.8405	-28.449	-27.232	unpub.
57	Apc-Berekalja I	APC3	20	-10.4645	-11.45	-9.479	1.971	-25.0645	-26.05	-24.079	unpub.
57	Apc-Berekalja I	APC4	17	-8.5925	-9.916	-7.269	2.647	-23.1925	-24.516	-21.869	unpub.
57	Apc-Berekalja I	APC5	17	-10.4415	-11.405	-9.478	1.927	-25.0415	-26.005	-24.078	unpub.
57	Apc-Berekalja I	APC6	14	-5.28	-6.39	-4.17	2.22	-19.88	-20.99	-18.77	unpub.
57	Apc-Berekalja I	APC7	15	-11.638	-12.319	-10.957	1.362	-26.238	-26.919	-25.557	unpub.
57	Apc-Berekalja I	APC8	14	-11.143	-11.746	-10.54	1.206	-25.743	-26.346	-25.14	unpub.
		46

## Sheet: SI Table 5_Dentine_CSIA_δ15N
Site No.	Site	Sample Tooth Id.	N	ß value Mdpt (‰)	ß value low (‰)	ß value high (‰)	Ampitude	Reference
11	Bischoffsheim	BIS3	6	-5.75767	-8.66767	-2.84767	5.82	unpub. Gillis et al. Submitted
11	Bischoffsheim	BIS4	6	-5.38317	-8.10567	-2.66067	5.445	unpub. Gillis et al. Submitted
11	Bischoffsheim	BIS7	6	-5.07567	-7.62633	-2.525	5.10133	unpub. Gillis et al. Submitted
49	Ludwinowo 7	LUD1	6	-5.27467	-6.87033	-3.679	3.19133	Kendall et al. 2019
49	Ludwinowo 7	LUD10	2	-5.96267	-6.93433	-4.991	1.94333	Kendall et al. 2019
49	Ludwinowo 7	LUD5	3	-5.542	-6.33867	-4.74533	1.59333	Kendall et al. 2019
54	Balatonszárszó-Kis-erdei-dűlő	BAL2	4	-5.71567	-7.747	-3.68433	4.06267	unpub.
54	Balatonszárszó-Kis-erdei-dűlő	BAL3	5	-5.794	-7.64733	-3.94067	3.70667	unpub.
54	Balatonszárszó-Kis-erdei-dűlő	BAL5	4	-4.3335	-5.07667	-3.59033	1.48633	unpub.
57	Apc-Berekalja I	APC1	6	-4.65533	-5.825	-3.48567	2.33933	unpub.
57	Apc-Berekalja I	APC2	2	-4.29417	-5.51867	-3.06967	2.449	unpub.
57	Apc-Berekalja I	APC4	2	-5.716	-6.391	-5.041	1.35	unpub.
	12

## Sheet: SI_Table 6_Cervid collagen_δ13C
Site number	Site name	Species	δ13C coll(‰)	δ13Cdiet (‰)	Reference
1	Cuiry-lès-Chaudardes	Cervus elaphus	-22.8	-27.9	Balasse unpub. PhD thesis 1999
1	Cuiry-lès-Chaudardes	Cervus elaphus	-22.7	-27.8	Balasse unpub. PhD thesis 1999
1	Cuiry-lès-Chaudardes	Cervus elaphus	-23.4	-28.5	Balasse unpub. PhD thesis 1999
1	Cuiry-lès-Chaudardes	Cervus elaphus	-20.6	-25.7	Balasse unpub. PhD thesis 1999
1	Cuiry-lès-Chaudardes	Cervus elaphus	-24	-29.1	Balasse unpub. PhD thesis 1999
1	Cuiry-lès-Chaudardes	Capreolous capreolous	-23.4	-28.5	Balasse unpub. PhD thesis 1999
1	Cuiry-lès-Chaudardes	Capreolous capreolous	-23.7	-28.8	Balasse unpub. PhD thesis 1999
1	Cuiry-lès-Chaudardes	Capreolous capreolous	-22.8	-27.9	Balasse unpub. PhD thesis 1999
1	Cuiry-lès-Chaudardes	Capreolous capreolous	-24.5	-29.6	Balasse unpub. PhD thesis 1999
1	Cuiry-lès-Chaudardes	Capreolous capreolous	-24.4	-29.5	Balasse unpub. PhD thesis 1999
11	Bischoffsheim	Cervus elaphus	-22.682	-27.782	unpub. Gillis et al. Submitted
11	Bischoffsheim	Cervus elaphus	-22.713	-27.813	unpub. Gillis et al. Submitted
11	Bischoffsheim	Cervus elaphus	-21.943	-27.043	unpub. Gillis et al. Submitted
11	Bischoffsheim	Cervus elaphus	-23.147	-28.247	unpub. Gillis et al. Submitted
11	Bischoffsheim	Cervus elaphus	-21.862	-26.962	unpub. Gillis et al. Submitted
11	Bischoffsheim	Cervus elaphus	-22.025	-27.125	unpub. Gillis et al. Submitted
12	Herxheim average	Deer sp.	-21.5	-26.6	Durrwachter et al. 2005
12	Herxheimaverage +sd	Deer sp.	-20.6	-25.7	Durrwachter et al. 2005
12	Herxheim average -sd	Deer sp.	-22.4	-27.5	Durrwachter et al. 2005
14	Vaihingen	Cervus elaphus	-23.3	-28.4	Fraser et al. 2013
14	Vaihingen	Cervus elaphus	-23.4	-28.5	Fraser et al. 2013
14	Vaihingen	Cervus elaphus	-23.6	-28.7	Fraser et al. 2013
14	Vaihingen	Cervus elaphus	-23	-28.1	Fraser et al. 2013
14	Vaihingen	Cervus elaphus	-23.4	-28.5	Fraser et al. 2013
14	Vaihingen	Cervus elaphus	-22.8	-27.9	Fraser et al. 2013
14	Vaihingen	Cervus elaphus	-23.2	-28.3	Fraser et al. 2013
14	Vaihingen	Cervus elaphus	-22.8	-27.9	Fraser et al. 2013
14	Vaihingen	Cervus elaphus	-23.5	-28.6	Fraser et al. 2013
19	Karsdorf	Deer sp.	-21.4	-26.5	Oleze et al. 201
22	Aiterhofen	Cattle/red deer?	-23.4	-28.5	Hoffman et al. 2013
25	Rutzig/Haid	Cervus elaphus	-22.7	-27.8	Bickle et al. 2013a
54	Balatonszárszó-Kis-erdei-dűlő	Cervus elaphus	-20.9	-26	Whittle et al. 2013
54	Balatonszárszó-Kis-erdei-dűlő	Capreolous capreolous	-23.7	-28.8	Whittle et al. 2013
54	Balatonszárszó-Kis-erdei-dűlő	Capreolous capreolous	-22.2	-27.3	Whittle et al. 2013
54	Balatonszárszó-Kis-erdei-dűlő	Cervus elaphus	-21.55	-26.65	Whittle et al. 2013

## Sheet: SI_Table 7_Correlation matrix
All data (N=734)	Significant results (p < 0.05) in Italics.Only Longitude and PMW have r values are >0.5, which equates to r2 value of >0.25
r p	Latitude	Longitude	δ13C-diet	SRO	DNR	TWS	TMW	PMS	PMW	MFC
Latitude		0.0011	0.73	0	0	0	0	0	0	0
Longitude	0.12		0	0	0	0	0	0.0003	0	0
δ13C-diet	0.01	0.66		0.0018	0.0016	0.0325	0	0	0	0.0002
SRO	-0.19	-0.28	-0.12		0	0.0175	0	0	0	0
DNR	0.37	0.29	0.12	-0.22		0	0	0	0	0
TWS	0.43	0.16	0.08	-0.09	0.28		0	0	0.0821	0.6647
TMW	-0.3	-0.76	-0.48	0.19	-0.26	0.29		0.1107	0	0
PMS	-0.46	0.13	0.16	-0.31	-0.26	-0.34	0.06		0.8062	0.09
PMW	-0.36	-0.86	-0.54	0.3	-0.33	0.06	0.95	-0.01		0
MFC	0.71	0.3	0.14	-0.26	0.28	0.02	-0.55	-0.06	-0.53
Collagen (N=292)	Significant results (p < 0.05) in Italics. All r values are <0.4 except for Longitude, which equates to r2 value of <0.16
r p	Latitude	Longitude	δ13C-diet	SRO	DNR	TWS	TMW	PMS	PMW	MFC
Latitude		0	0	0.0036	0.0005	0.118	0.0258	0	0.235	0
Longitude	-0.33		0	0.0018	0	0.4322	0	0.1533	0	0
δ13C-diet	-0.25	0.73		0.0012	0.0126	0.5625	0	0.0004	0	0
SRO	0.17	-0.18	-0.19		0.7833	0.379	0.7378	0	0.098	0.1307
DNR	0.2	0.32	0.15	0.02		0.0038	0	0	0	0.0671
TWS	-0.09	0.05	0.03	0.05	0.17		0	0.2485	0	0
TMW	-0.13	-0.57	-0.37	-0.02	-0.26	0.67		0	0	0
PMS	-0.37	0.08	0.2	-0.52	-0.5	-0.07	0.25		0.1936	0.0008
PMW	0.07	-0.72	-0.5	0.1	-0.26	0.54	0.94	0.08		0.377
MFC	0.82	-0.32	-0.29	0.09	0.11	-0.32	-0.24	-0.2	-0.05
Dairy lipids (N=292)	Significant results (p < 0.05) in Italics.Only Longitude, TMW, PMW and MFC have r values are >0.5, which equates to r2 value of >0.25
r p	Latitude	Longitude	δ13C-diet	SRO	DNR	TWS	TMW	PMS	PMW	MFC
Latitude		0	0	0	0	0	0	0.0001	0	0
Longitude	0.39		0	0	0	0	0	0	0	0
δ13C-diet	0.21	0.65		0.0041	0.0053	0	0	0.0005	0	0
SRO	-0.47	-0.4	-0.15		0	0	0	0.0005	0	0
DNR	0.44	0.32	0.15	-0.35		0	0	0.6698	0	0
TWS	0.81	0.44	0.21	-0.38	0.38		0	0	0	0
TMW	-0.47	-0.95	-0.63	0.45	-0.33	-0.35		0	0	0
PMS	-0.2	0.21	0.18	-0.19	0.02	-0.32	-0.22		0	0
PMW	-0.58	-0.95	-0.62	0.49	-0.4	-0.49	0.98	-0.24		0
MFC	0.73	0.72	0.5	-0.58	0.4	0.5	-0.81	0.28	-0.86
Bioapatite (N=90)	Significant results (p < 0.0005) in Italics. All r values are <0.4 except for Longitude, which equates to r2 value of <0.16
r p	Latitude	Longitude	δ13C-diet	SRO	DNR	TWS	TMW	PMS	PMW	MFC
Latitude		0.0593	0.9307	0.0565	0	0.0013	0	0	0	0
Longitude	0.2		0	0.0781	0.6107	0.0161	0	0.046	0	0.9318
δ13C-diet	-0.01	0.62		0.0556	0.2014	0.185	0.0066	0.8407	0.0006	0.5538
SRO	-0.2	0.19	0.2		0.1141	0.5689	0.0502	0.0487	0.5917	0.9924
DNR	0.6	0.05	-0.14	-0.17		0	0.0647	0	0.8431	0.0598
TWS	0.33	0.25	0.14	-0.06	0.64		0	0.002	0.04	0.7562
TMW	-0.42	-0.52	-0.28	-0.21	0.2	0.48		0.0843	0	0
PMS	-0.44	-0.21	-0.02	-0.21	-0.74	-0.32	0.18		0.0736	0.0043
PMW	-0.55	-0.71	-0.36	-0.06	-0.02	0.22	0.92	0.19		0
MFC	0.85	-0.01	-0.06	0	0.2	-0.03	-0.58	-0.3	-0.5
